# Supplementary material
Source: MDPI journal article supplement (https://www.mdpi.com/2073-4433/14/2/280)

```
In [1]: import numpy as np
from tqdm import tqdm
import os
import cv2
import shutil
import random
import time
import matplotlib.pyplot as plt
%matplotlib inline
import tensorflow as tf
from tensorflow import keras
from keras import backend as K
from tensorflow.keras.layers import Dense, Dropout, Activation, Flatten, SpatialDropout2D
from tensorflow.keras.optimizers import Adam
from tensorflow.keras.metrics import categorical_crossentropy
from tensorflow.keras.preprocessing.image import ImageDataGenerator
from tensorflow.keras.preprocessing import image
from tensorflow.keras.models import Model
from tensorflow.keras.applications import imagenet_utils
from tensorflow.keras.applications import MobileNet
from tensorflow.keras.applications.mobilenet import preprocess_input
from IPython.display import Image
from sklearn.metrics import confusion_matrix
import itertools
import datetime
import time
```

```
In [2]: mobile = tf.keras.applications.mobilenet.MobileNet()
```

```
In [3]: mobile.summary()
```

Model: "mobilenet\_1.00\_224"

| Layer (type)                          | Output Shape          | Param # |
|---------------------------------------|-----------------------|---------|
| =====                                 |                       |         |
| input_1 (InputLayer)                  | [(None, 224, 224, 3)] | 0       |
| conv1 (Conv2D)                        | (None, 112, 112, 32)  | 864     |
| conv1_bn (BatchNormalizatio<br>n)     | (None, 112, 112, 32)  | 128     |
| conv1_relu (ReLU)                     | (None, 112, 112, 32)  | 0       |
| conv_dw_1 (DepthwiseConv2D)           | (None, 112, 112, 32)  | 288     |
| conv_dw_1_bn (BatchNormaliz<br>ation) | (None, 112, 112, 32)  | 128     |
| conv_dw_1_relu (ReLU)                 | (None, 112, 112, 32)  | 0       |
| conv_pw_1 (Conv2D)                    | (None, 112, 112, 64)  | 2048    |
| conv_pw_1_bn (BatchNormaliz<br>ation) | (None, 112, 112, 64)  | 256     |
| conv_pw_1_relu (ReLU)                 | (None, 112, 112, 64)  | 0       |

|                                       |                      |       |
|---------------------------------------|----------------------|-------|
| conv_pad_2 (ZeroPadding2D)            | (None, 113, 113, 64) | 0     |
| conv_dw_2 (DepthwiseConv2D)           | (None, 56, 56, 64)   | 576   |
| conv_dw_2_bn (BatchNormaliz<br>ation) | (None, 56, 56, 64)   | 256   |
| conv_dw_2_relu (ReLU)                 | (None, 56, 56, 64)   | 0     |
| conv_pw_2 (Conv2D)                    | (None, 56, 56, 128)  | 8192  |
| conv_pw_2_bn (BatchNormaliz<br>ation) | (None, 56, 56, 128)  | 512   |
| conv_pw_2_relu (ReLU)                 | (None, 56, 56, 128)  | 0     |
| conv_dw_3 (DepthwiseConv2D)           | (None, 56, 56, 128)  | 1152  |
| conv_dw_3_bn (BatchNormaliz<br>ation) | (None, 56, 56, 128)  | 512   |
| conv_dw_3_relu (ReLU)                 | (None, 56, 56, 128)  | 0     |
| conv_pw_3 (Conv2D)                    | (None, 56, 56, 128)  | 16384 |
| conv_pw_3_bn (BatchNormaliz<br>ation) | (None, 56, 56, 128)  | 512   |
| conv_pw_3_relu (ReLU)                 | (None, 56, 56, 128)  | 0     |
| conv_pad_4 (ZeroPadding2D)            | (None, 57, 57, 128)  | 0     |
| conv_dw_4 (DepthwiseConv2D)           | (None, 28, 28, 128)  | 1152  |
| conv_dw_4_bn (BatchNormaliz<br>ation) | (None, 28, 28, 128)  | 512   |
| conv_dw_4_relu (ReLU)                 | (None, 28, 28, 128)  | 0     |
| conv_pw_4 (Conv2D)                    | (None, 28, 28, 256)  | 32768 |
| conv_pw_4_bn (BatchNormaliz<br>ation) | (None, 28, 28, 256)  | 1024  |
| conv_pw_4_relu (ReLU)                 | (None, 28, 28, 256)  | 0     |
| conv_dw_5 (DepthwiseConv2D)           | (None, 28, 28, 256)  | 2304  |
| conv_dw_5_bn (BatchNormaliz<br>ation) | (None, 28, 28, 256)  | 1024  |
| conv_dw_5_relu (ReLU)                 | (None, 28, 28, 256)  | 0     |
| conv_pw_5 (Conv2D)                    | (None, 28, 28, 256)  | 65536 |
| conv_pw_5_bn (BatchNormaliz<br>ation) | (None, 28, 28, 256)  | 1024  |
| conv_pw_5_relu (ReLU)                 | (None, 28, 28, 256)  | 0     |
| conv_pad_6 (ZeroPadding2D)            | (None, 29, 29, 256)  | 0     |
| conv_dw_6 (DepthwiseConv2D)           | (None, 14, 14, 256)  | 2304  |

|                                        |                     |        |
|----------------------------------------|---------------------|--------|
| conv_dw_6_bn (BatchNormaliz<br>ation)  | (None, 14, 14, 256) | 1024   |
| conv_dw_6_relu (ReLU)                  | (None, 14, 14, 256) | 0      |
| conv_pw_6 (Conv2D)                     | (None, 14, 14, 512) | 131072 |
| conv_pw_6_bn (BatchNormaliz<br>ation)  | (None, 14, 14, 512) | 2048   |
| conv_pw_6_relu (ReLU)                  | (None, 14, 14, 512) | 0      |
| conv_dw_7 (DepthwiseConv2D)            | (None, 14, 14, 512) | 4608   |
| conv_dw_7_bn (BatchNormaliz<br>ation)  | (None, 14, 14, 512) | 2048   |
| conv_dw_7_relu (ReLU)                  | (None, 14, 14, 512) | 0      |
| conv_pw_7 (Conv2D)                     | (None, 14, 14, 512) | 262144 |
| conv_pw_7_bn (BatchNormaliz<br>ation)  | (None, 14, 14, 512) | 2048   |
| conv_pw_7_relu (ReLU)                  | (None, 14, 14, 512) | 0      |
| conv_dw_8 (DepthwiseConv2D)            | (None, 14, 14, 512) | 4608   |
| conv_dw_8_bn (BatchNormaliz<br>ation)  | (None, 14, 14, 512) | 2048   |
| conv_dw_8_relu (ReLU)                  | (None, 14, 14, 512) | 0      |
| conv_pw_8 (Conv2D)                     | (None, 14, 14, 512) | 262144 |
| conv_pw_8_bn (BatchNormaliz<br>ation)  | (None, 14, 14, 512) | 2048   |
| conv_pw_8_relu (ReLU)                  | (None, 14, 14, 512) | 0      |
| conv_dw_9 (DepthwiseConv2D)            | (None, 14, 14, 512) | 4608   |
| conv_dw_9_bn (BatchNormaliz<br>ation)  | (None, 14, 14, 512) | 2048   |
| conv_dw_9_relu (ReLU)                  | (None, 14, 14, 512) | 0      |
| conv_pw_9 (Conv2D)                     | (None, 14, 14, 512) | 262144 |
| conv_pw_9_bn (BatchNormaliz<br>ation)  | (None, 14, 14, 512) | 2048   |
| conv_pw_9_relu (ReLU)                  | (None, 14, 14, 512) | 0      |
| conv_dw_10 (DepthwiseConv2D<br>)       | (None, 14, 14, 512) | 4608   |
| conv_dw_10_bn (BatchNormali<br>zation) | (None, 14, 14, 512) | 2048   |
| conv_dw_10_relu (ReLU)                 | (None, 14, 14, 512) | 0      |
| conv_pw_10 (Conv2D)                    | (None, 14, 14, 512) | 262144 |
| conv_pw_10_bn (BatchNormali            | (None, 14, 14, 512) | 2048   |

|                                                   |                     |         |
|---------------------------------------------------|---------------------|---------|
| zation)                                           |                     |         |
| conv_pw_10_relu (ReLU)                            | (None, 14, 14, 512) | 0       |
| conv_dw_11 (DepthwiseConv2D)                      | (None, 14, 14, 512) | 4608    |
| conv_dw_11_bn (BatchNormalization)                | (None, 14, 14, 512) | 2048    |
| conv_dw_11_relu (ReLU)                            | (None, 14, 14, 512) | 0       |
| conv_pw_11 (Conv2D)                               | (None, 14, 14, 512) | 262144  |
| conv_pw_11_bn (BatchNormalization)                | (None, 14, 14, 512) | 2048    |
| conv_pw_11_relu (ReLU)                            | (None, 14, 14, 512) | 0       |
| conv_pad_12 (ZeroPadding2D)                       | (None, 15, 15, 512) | 0       |
| conv_dw_12 (DepthwiseConv2D)                      | (None, 7, 7, 512)   | 4608    |
| conv_dw_12_bn (BatchNormalization)                | (None, 7, 7, 512)   | 2048    |
| conv_dw_12_relu (ReLU)                            | (None, 7, 7, 512)   | 0       |
| conv_pw_12 (Conv2D)                               | (None, 7, 7, 1024)  | 524288  |
| conv_pw_12_bn (BatchNormalization)                | (None, 7, 7, 1024)  | 4096    |
| conv_pw_12_relu (ReLU)                            | (None, 7, 7, 1024)  | 0       |
| conv_dw_13 (DepthwiseConv2D)                      | (None, 7, 7, 1024)  | 9216    |
| conv_dw_13_bn (BatchNormalization)                | (None, 7, 7, 1024)  | 4096    |
| conv_dw_13_relu (ReLU)                            | (None, 7, 7, 1024)  | 0       |
| conv_pw_13 (Conv2D)                               | (None, 7, 7, 1024)  | 1048576 |
| conv_pw_13_bn (BatchNormalization)                | (None, 7, 7, 1024)  | 4096    |
| conv_pw_13_relu (ReLU)                            | (None, 7, 7, 1024)  | 0       |
| global_average_pooling2d (GlobalAveragePooling2D) | (None, 1, 1, 1024)  | 0       |
| dropout (Dropout)                                 | (None, 1, 1, 1024)  | 0       |
| conv_preds (Conv2D)                               | (None, 1, 1, 1000)  | 1025000 |
| reshape_2 (Reshape)                               | (None, 1000)        | 0       |
| predictions (Activation)                          | (None, 1000)        | 0       |

=====  
Total params: 4,253,864  
Trainable params: 4,231,976



Non-trainable params: 21,888

```
In [4]: def prepare_image(file):
        img_path = ''
        img = image.load_img(img_path + file, target_size=(224, 224))
        img_array = image.img_to_array(img)
        img_array_expanded_dims = np.expand_dims(img_array, axis=0)
        return tf.keras.applications.mobilenet.preprocess_input(img_array_expanded_dims)
```

```
In [5]: num_of_train_samples = 30999
        num_of_valid_samples = 13325
        num_of_test_samples = 110
```

```
In [6]: #Show sample image
        Image(filename='C:/Users/GyasiEmmanuelKwabena/Desktop/Dataset/train/Cb/Cb-N116.JPG', wi
```

Out[6]:

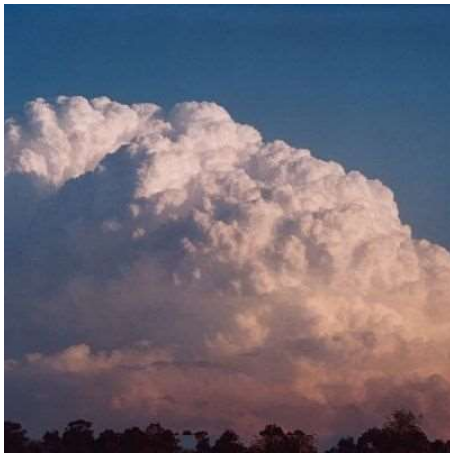

```
In [7]: train_path = 'C:/Users/GyasiEmmanuelKwabena/Desktop/Dataset/train'
        valid_path = 'C:/Users/GyasiEmmanuelKwabena/Desktop/Dataset/valid'

        train_batches = ImageDataGenerator(preprocessing_function=tf.keras.applications.mobilenet_v2.preprocess_input,
        directory=train_path, target_size=(224,224), batch_size=22)
        valid_batches = ImageDataGenerator(preprocessing_function=tf.keras.applications.mobilenet_v2.preprocess_input,
        directory=valid_path, target_size=(224,224), batch_size=22)

        batchX, batchy = train_batches.next()
        print('Batch shape=%s, min=%.3f, max=%.3f' % (batchX.shape, batchX.min(), batchX.max()))
```

Found 30999 images belonging to 11 classes.  
 Found 13325 images belonging to 11 classes.  
 Batch shape=(22, 224, 224, 3), min=-1.000, max=1.000

```
In [8]: # Modify the model: Mobilenet

        base_model=MobileNet(weights='imagenet',include_top=False) #imports the mobilenet model
        x=base_model.output
        x=GlobalAveragePooling2D()(x)
        x=Dense(300,activation='relu')(x) # 500 we add dense layers so that the model can learn
        x=Dense(200,activation='relu')(x) # 100 dense layer 2
```

```
x=Dense(512,activation='relu')(x) # 512 dense Layer 3
preds=Dense(11,activation='softmax')(x) #final Layer with softmax activation
```

WARNING:tensorflow: `input\_shape` is undefined or non-square, or `rows` is not in [128, 160, 192, 224]. Weights for input shape (224, 224) will be loaded as the default.

```
In [9]: for i,layer in enumerate(base_model.layers):
        print(i,layer.name)
```

```
0 input_2
1 conv1
2 conv1_bn
3 conv1_relu
4 conv_dw_1
5 conv_dw_1_bn
6 conv_dw_1_relu
7 conv_pw_1
8 conv_pw_1_bn
9 conv_pw_1_relu
10 conv_pad_2
11 conv_dw_2
12 conv_dw_2_bn
13 conv_dw_2_relu
14 conv_pw_2
15 conv_pw_2_bn
16 conv_pw_2_relu
17 conv_dw_3
18 conv_dw_3_bn
19 conv_dw_3_relu
20 conv_pw_3
21 conv_pw_3_bn
22 conv_pw_3_relu
23 conv_pad_4
24 conv_dw_4
25 conv_dw_4_bn
26 conv_dw_4_relu
27 conv_pw_4
28 conv_pw_4_bn
29 conv_pw_4_relu
30 conv_dw_5
31 conv_dw_5_bn
32 conv_dw_5_relu
33 conv_pw_5
34 conv_pw_5_bn
35 conv_pw_5_relu
36 conv_pad_6
37 conv_dw_6
38 conv_dw_6_bn
39 conv_dw_6_relu
40 conv_pw_6
41 conv_pw_6_bn
42 conv_pw_6_relu
43 conv_dw_7
44 conv_dw_7_bn
45 conv_dw_7_relu
46 conv_pw_7
47 conv_pw_7_bn
48 conv_pw_7_relu
49 conv_dw_8
50 conv_dw_8_bn
51 conv_dw_8_relu
52 conv_pw_8
53 conv_pw_8_bn
54 conv_pw_8_relu
55 conv_dw_9
```

```
56 conv_dw_9_bn
57 conv_dw_9_relu
58 conv_pw_9
59 conv_pw_9_bn
60 conv_pw_9_relu
61 conv_dw_10
62 conv_dw_10_bn
63 conv_dw_10_relu
64 conv_pw_10
65 conv_pw_10_bn
66 conv_pw_10_relu
67 conv_dw_11
68 conv_dw_11_bn
69 conv_dw_11_relu
70 conv_pw_11
71 conv_pw_11_bn
72 conv_pw_11_relu
73 conv_pad_12
74 conv_dw_12
75 conv_dw_12_bn
76 conv_dw_12_relu
77 conv_pw_12
78 conv_pw_12_bn
79 conv_pw_12_relu
80 conv_dw_13
81 conv_dw_13_bn
82 conv_dw_13_relu
83 conv_pw_13
84 conv_pw_13_bn
85 conv_pw_13_relu
```

```
In [10]: #we want to set the first 20 layers of the network to be non-trainable
        for layer in base_model.layers[:20]:
            layer.trainable=False
```

```
In [11]: CloudMobiNet_model=Model(inputs=base_model.input,outputs=preds)
```

```
In [12]: CloudMobiNet_model.summary()
```

Model: "model"

| Layer (type)                          | Output Shape            | Param # |
|---------------------------------------|-------------------------|---------|
| =====                                 |                         |         |
| input_2 (InputLayer)                  | [(None, None, None, 3)] | 0       |
| conv1 (Conv2D)                        | (None, None, None, 32)  | 864     |
| conv1_bn (BatchNormalizatio<br>n)     | (None, None, None, 32)  | 128     |
| conv1_relu (ReLU)                     | (None, None, None, 32)  | 0       |
| conv_dw_1 (DepthwiseConv2D)           | (None, None, None, 32)  | 288     |
| conv_dw_1_bn (BatchNormaliz<br>ation) | (None, None, None, 32)  | 128     |
| conv_dw_1_relu (ReLU)                 | (None, None, None, 32)  | 0       |
| conv_pw_1 (Conv2D)                    | (None, None, None, 64)  | 2048    |

|                                   |                         |       |
|-----------------------------------|-------------------------|-------|
| conv_pw_1_bn (BatchNormalization) | (None, None, None, 64)  | 256   |
| conv_pw_1_relu (ReLU)             | (None, None, None, 64)  | 0     |
| conv_pad_2 (ZeroPadding2D)        | (None, None, None, 64)  | 0     |
| conv_dw_2 (DepthwiseConv2D)       | (None, None, None, 64)  | 576   |
| conv_dw_2_bn (BatchNormalization) | (None, None, None, 64)  | 256   |
| conv_dw_2_relu (ReLU)             | (None, None, None, 64)  | 0     |
| conv_pw_2 (Conv2D)                | (None, None, None, 128) | 8192  |
| conv_pw_2_bn (BatchNormalization) | (None, None, None, 128) | 512   |
| conv_pw_2_relu (ReLU)             | (None, None, None, 128) | 0     |
| conv_dw_3 (DepthwiseConv2D)       | (None, None, None, 128) | 1152  |
| conv_dw_3_bn (BatchNormalization) | (None, None, None, 128) | 512   |
| conv_dw_3_relu (ReLU)             | (None, None, None, 128) | 0     |
| conv_pw_3 (Conv2D)                | (None, None, None, 128) | 16384 |
| conv_pw_3_bn (BatchNormalization) | (None, None, None, 128) | 512   |
| conv_pw_3_relu (ReLU)             | (None, None, None, 128) | 0     |
| conv_pad_4 (ZeroPadding2D)        | (None, None, None, 128) | 0     |
| conv_dw_4 (DepthwiseConv2D)       | (None, None, None, 128) | 1152  |
| conv_dw_4_bn (BatchNormalization) | (None, None, None, 128) | 512   |
| conv_dw_4_relu (ReLU)             | (None, None, None, 128) | 0     |
| conv_pw_4 (Conv2D)                | (None, None, None, 256) | 32768 |
| conv_pw_4_bn (BatchNormalization) | (None, None, None, 256) | 1024  |
| conv_pw_4_relu (ReLU)             | (None, None, None, 256) | 0     |
| conv_dw_5 (DepthwiseConv2D)       | (None, None, None, 256) | 2304  |
| conv_dw_5_bn (BatchNormalization) | (None, None, None, 256) | 1024  |
| conv_dw_5_relu (ReLU)             | (None, None, None, 256) | 0     |
| conv_pw_5 (Conv2D)                | (None, None, None, 256) | 65536 |
| conv_pw_5_bn (BatchNormalization) | (None, None, None, 256) | 1024  |
| conv_pw_5_relu (ReLU)             | (None, None, None, 256) | 0     |

|                                    |                         |        |
|------------------------------------|-------------------------|--------|
| conv_pad_6 (ZeroPadding2D)         | (None, None, None, 256) | 0      |
| conv_dw_6 (DepthwiseConv2D)        | (None, None, None, 256) | 2304   |
| conv_dw_6_bn (BatchNormalization)  | (None, None, None, 256) | 1024   |
| conv_dw_6_relu (ReLU)              | (None, None, None, 256) | 0      |
| conv_pw_6 (Conv2D)                 | (None, None, None, 512) | 131072 |
| conv_pw_6_bn (BatchNormalization)  | (None, None, None, 512) | 2048   |
| conv_pw_6_relu (ReLU)              | (None, None, None, 512) | 0      |
| conv_dw_7 (DepthwiseConv2D)        | (None, None, None, 512) | 4608   |
| conv_dw_7_bn (BatchNormalization)  | (None, None, None, 512) | 2048   |
| conv_dw_7_relu (ReLU)              | (None, None, None, 512) | 0      |
| conv_pw_7 (Conv2D)                 | (None, None, None, 512) | 262144 |
| conv_pw_7_bn (BatchNormalization)  | (None, None, None, 512) | 2048   |
| conv_pw_7_relu (ReLU)              | (None, None, None, 512) | 0      |
| conv_dw_8 (DepthwiseConv2D)        | (None, None, None, 512) | 4608   |
| conv_dw_8_bn (BatchNormalization)  | (None, None, None, 512) | 2048   |
| conv_dw_8_relu (ReLU)              | (None, None, None, 512) | 0      |
| conv_pw_8 (Conv2D)                 | (None, None, None, 512) | 262144 |
| conv_pw_8_bn (BatchNormalization)  | (None, None, None, 512) | 2048   |
| conv_pw_8_relu (ReLU)              | (None, None, None, 512) | 0      |
| conv_dw_9 (DepthwiseConv2D)        | (None, None, None, 512) | 4608   |
| conv_dw_9_bn (BatchNormalization)  | (None, None, None, 512) | 2048   |
| conv_dw_9_relu (ReLU)              | (None, None, None, 512) | 0      |
| conv_pw_9 (Conv2D)                 | (None, None, None, 512) | 262144 |
| conv_pw_9_bn (BatchNormalization)  | (None, None, None, 512) | 2048   |
| conv_pw_9_relu (ReLU)              | (None, None, None, 512) | 0      |
| conv_dw_10 (DepthwiseConv2D)       | (None, None, None, 512) | 4608   |
| conv_dw_10_bn (BatchNormalization) | (None, None, None, 512) | 2048   |

|                                                     |                          |         |
|-----------------------------------------------------|--------------------------|---------|
| conv_dw_10_relu (ReLU)                              | (None, None, None, 512)  | 0       |
| conv_pw_10 (Conv2D)                                 | (None, None, None, 512)  | 262144  |
| conv_pw_10_bn (BatchNormalization)                  | (None, None, None, 512)  | 2048    |
| conv_pw_10_relu (ReLU)                              | (None, None, None, 512)  | 0       |
| conv_dw_11 (DepthwiseConv2D)                        | (None, None, None, 512)  | 4608    |
| conv_dw_11_bn (BatchNormalization)                  | (None, None, None, 512)  | 2048    |
| conv_dw_11_relu (ReLU)                              | (None, None, None, 512)  | 0       |
| conv_pw_11 (Conv2D)                                 | (None, None, None, 512)  | 262144  |
| conv_pw_11_bn (BatchNormalization)                  | (None, None, None, 512)  | 2048    |
| conv_pw_11_relu (ReLU)                              | (None, None, None, 512)  | 0       |
| conv_pad_12 (ZeroPadding2D)                         | (None, None, None, 512)  | 0       |
| conv_dw_12 (DepthwiseConv2D)                        | (None, None, None, 512)  | 4608    |
| conv_dw_12_bn (BatchNormalization)                  | (None, None, None, 512)  | 2048    |
| conv_dw_12_relu (ReLU)                              | (None, None, None, 512)  | 0       |
| conv_pw_12 (Conv2D)                                 | (None, None, None, 1024) | 524288  |
| conv_pw_12_bn (BatchNormalization)                  | (None, None, None, 1024) | 4096    |
| conv_pw_12_relu (ReLU)                              | (None, None, None, 1024) | 0       |
| conv_dw_13 (DepthwiseConv2D)                        | (None, None, None, 1024) | 9216    |
| conv_dw_13_bn (BatchNormalization)                  | (None, None, None, 1024) | 4096    |
| conv_dw_13_relu (ReLU)                              | (None, None, None, 1024) | 0       |
| conv_pw_13 (Conv2D)                                 | (None, None, None, 1024) | 1048576 |
| conv_pw_13_bn (BatchNormalization)                  | (None, None, None, 1024) | 4096    |
| conv_pw_13_relu (ReLU)                              | (None, None, None, 1024) | 0       |
| global_average_pooling2d_1 (GlobalAveragePooling2D) | (None, 1024)             | 0       |
| dense (Dense)                                       | (None, 300)              | 307500  |
| dense_1 (Dense)                                     | (None, 200)              | 60200   |
| dense_2 (Dense)                                     | (None, 512)              | 102912  |

dense\_3 (Dense) (None, 11) 5643

```
=====
Total params: 3,705,119
Trainable params: 3,669,215
Non-trainable params: 35,904
```

---

```
In [13]: train_datagen=ImageDataGenerator(preprocessing_function=preprocess_input) #included in

train_generator=train_datagen.flow_from_directory(train_path,
                                                  target_size=(224, 224),
                                                  color_mode='rgb',
                                                  batch_size=22,
                                                  class_mode='categorical',
                                                  shuffle=True)

test_datagen = ImageDataGenerator()

validation_generator = test_datagen.flow_from_directory(valid_path,
                                                         target_size=(224, 224),
                                                         color_mode='rgb',
                                                         batch_size=22,
                                                         class_mode='categorical',
                                                         shuffle=True)
```

Found 30999 images belonging to 11 classes.  
Found 13325 images belonging to 11 classes.

```
In [14]: #Images Classes with index
print(train_generator.class_indices)

{'Ac': 0, 'As': 1, 'Cb': 2, 'Cc': 3, 'Ci': 4, 'Cs': 5, 'Ct': 6, 'Cu': 7, 'Ns': 8, 'Sc': 9, 'St': 10}
```

```
In [15]: CloudMobiNet_model.compile(optimizer=Adam(learning_rate=0.0001), loss='categorical_crossentropy')
```

```
In [16]: start = datetime.datetime.now()

history = CloudMobiNet_model.fit(train_generator,
                                steps_per_epoch=len(train_batches)//train_generator.batch_size,
                                validation_data=valid_batches,
                                validation_steps=len(valid_batches)//valid_batches.batch_size,
                                epochs=130,
                                verbose=2
                                )

end= datetime.datetime.now()
elapsed= end-start
print ('Time: ', elapsed)
```

Epoch 1/130  
64/64 - 132s - loss: 2.1058 - accuracy: 0.2927 - val\_loss: 2.1467 - val\_accuracy: 0.2458  
- 132s/epoch - 2s/step  
Epoch 2/130  
64/64 - 131s - loss: 1.6764 - accuracy: 0.4382 - val\_loss: 1.7775 - val\_accuracy: 0.3973

```
- 131s/epoch - 2s/step
Epoch 3/130
64/64 - 132s - loss: 1.4733 - accuracy: 0.5028 - val_loss: 1.6209 - val_accuracy: 0.4512
- 132s/epoch - 2s/step
Epoch 4/130
64/64 - 132s - loss: 1.3195 - accuracy: 0.5455 - val_loss: 1.4848 - val_accuracy: 0.4933
- 132s/epoch - 2s/step
Epoch 5/130
64/64 - 132s - loss: 1.2639 - accuracy: 0.5675 - val_loss: 1.3493 - val_accuracy: 0.5556
- 132s/epoch - 2s/step
Epoch 6/130
64/64 - 131s - loss: 1.1417 - accuracy: 0.6250 - val_loss: 1.1267 - val_accuracy: 0.6111
- 131s/epoch - 2s/step
Epoch 7/130
64/64 - 131s - loss: 1.1474 - accuracy: 0.6143 - val_loss: 1.1028 - val_accuracy: 0.6313
- 131s/epoch - 2s/step
Epoch 8/130
64/64 - 132s - loss: 1.0466 - accuracy: 0.6435 - val_loss: 1.1998 - val_accuracy: 0.5909
- 132s/epoch - 2s/step
Epoch 9/130
64/64 - 131s - loss: 0.9849 - accuracy: 0.6697 - val_loss: 1.0519 - val_accuracy: 0.6347
- 131s/epoch - 2s/step
Epoch 10/130
64/64 - 131s - loss: 0.8747 - accuracy: 0.7038 - val_loss: 1.0734 - val_accuracy: 0.6347
- 131s/epoch - 2s/step
Epoch 11/130
64/64 - 131s - loss: 0.7763 - accuracy: 0.7422 - val_loss: 0.9012 - val_accuracy: 0.7003
- 131s/epoch - 2s/step
Epoch 12/130
64/64 - 133s - loss: 0.8291 - accuracy: 0.7195 - val_loss: 0.9216 - val_accuracy: 0.6953
- 133s/epoch - 2s/step
Epoch 13/130
64/64 - 133s - loss: 0.7676 - accuracy: 0.7464 - val_loss: 0.8668 - val_accuracy: 0.7104
- 133s/epoch - 2s/step
Epoch 14/130
64/64 - 132s - loss: 0.7233 - accuracy: 0.7443 - val_loss: 0.9766 - val_accuracy: 0.6633
- 132s/epoch - 2s/step
Epoch 15/130
64/64 - 132s - loss: 0.6970 - accuracy: 0.7628 - val_loss: 0.8618 - val_accuracy: 0.7172
- 132s/epoch - 2s/step
Epoch 16/130
64/64 - 132s - loss: 0.6439 - accuracy: 0.7841 - val_loss: 0.9038 - val_accuracy: 0.6852
- 132s/epoch - 2s/step
Epoch 17/130
64/64 - 131s - loss: 0.6509 - accuracy: 0.7791 - val_loss: 0.8481 - val_accuracy: 0.7357
- 131s/epoch - 2s/step
Epoch 18/130
64/64 - 132s - loss: 0.5377 - accuracy: 0.8175 - val_loss: 0.8421 - val_accuracy: 0.7323
- 132s/epoch - 2s/step
Epoch 19/130
64/64 - 131s - loss: 0.5051 - accuracy: 0.8317 - val_loss: 0.6238 - val_accuracy: 0.7963
- 131s/epoch - 2s/step
Epoch 20/130
64/64 - 131s - loss: 0.5084 - accuracy: 0.8295 - val_loss: 0.6728 - val_accuracy: 0.7912
- 131s/epoch - 2s/step
Epoch 21/130
64/64 - 133s - loss: 0.5101 - accuracy: 0.8402 - val_loss: 0.6787 - val_accuracy: 0.7593
- 133s/epoch - 2s/step
Epoch 22/130
64/64 - 131s - loss: 0.4774 - accuracy: 0.8395 - val_loss: 0.6839 - val_accuracy: 0.7677
- 131s/epoch - 2s/step
Epoch 23/130
64/64 - 132s - loss: 0.4374 - accuracy: 0.8473 - val_loss: 0.6310 - val_accuracy: 0.7946
- 132s/epoch - 2s/step
Epoch 24/130
```



64/64 - 132s - loss: 0.4446 - accuracy: 0.8409 - val\_loss: 0.5570 - val\_accuracy: 0.7946  
- 132s/epoch - 2s/step  
Epoch 25/130  
64/64 - 132s - loss: 0.4577 - accuracy: 0.8452 - val\_loss: 0.6505 - val\_accuracy: 0.7710  
- 132s/epoch - 2s/step  
Epoch 26/130  
64/64 - 132s - loss: 0.3961 - accuracy: 0.8693 - val\_loss: 0.5918 - val\_accuracy: 0.8013  
- 132s/epoch - 2s/step  
Epoch 27/130  
64/64 - 131s - loss: 0.3938 - accuracy: 0.8771 - val\_loss: 0.4794 - val\_accuracy: 0.8266  
- 131s/epoch - 2s/step  
Epoch 28/130  
64/64 - 132s - loss: 0.3552 - accuracy: 0.8786 - val\_loss: 0.7028 - val\_accuracy: 0.7795  
- 132s/epoch - 2s/step  
Epoch 29/130  
64/64 - 132s - loss: 0.3552 - accuracy: 0.8885 - val\_loss: 0.7102 - val\_accuracy: 0.7542  
- 132s/epoch - 2s/step  
Epoch 30/130  
64/64 - 131s - loss: 0.3284 - accuracy: 0.8949 - val\_loss: 0.4370 - val\_accuracy: 0.8653  
- 131s/epoch - 2s/step  
Epoch 31/130  
64/64 - 131s - loss: 0.3365 - accuracy: 0.8857 - val\_loss: 0.4079 - val\_accuracy: 0.8519  
- 131s/epoch - 2s/step  
Epoch 32/130  
64/64 - 131s - loss: 0.3000 - accuracy: 0.8942 - val\_loss: 0.4432 - val\_accuracy: 0.8519  
- 131s/epoch - 2s/step  
Epoch 33/130  
64/64 - 131s - loss: 0.2965 - accuracy: 0.8977 - val\_loss: 0.3968 - val\_accuracy: 0.8805  
- 131s/epoch - 2s/step  
Epoch 34/130  
64/64 - 132s - loss: 0.2725 - accuracy: 0.9155 - val\_loss: 0.5398 - val\_accuracy: 0.8165  
- 132s/epoch - 2s/step  
Epoch 35/130  
64/64 - 132s - loss: 0.2664 - accuracy: 0.9119 - val\_loss: 0.5580 - val\_accuracy: 0.8131  
- 132s/epoch - 2s/step  
Epoch 36/130  
64/64 - 131s - loss: 0.3085 - accuracy: 0.8970 - val\_loss: 0.4771 - val\_accuracy: 0.8316  
- 131s/epoch - 2s/step  
Epoch 37/130  
64/64 - 132s - loss: 0.2787 - accuracy: 0.9091 - val\_loss: 0.4895 - val\_accuracy: 0.8468  
- 132s/epoch - 2s/step  
Epoch 38/130  
64/64 - 132s - loss: 0.2336 - accuracy: 0.9240 - val\_loss: 0.3722 - val\_accuracy: 0.8620  
- 132s/epoch - 2s/step  
Epoch 39/130  
64/64 - 132s - loss: 0.3211 - accuracy: 0.8906 - val\_loss: 0.3512 - val\_accuracy: 0.8855  
- 132s/epoch - 2s/step  
Epoch 40/130  
64/64 - 131s - loss: 0.2284 - accuracy: 0.9190 - val\_loss: 0.4868 - val\_accuracy: 0.8283  
- 131s/epoch - 2s/step  
Epoch 41/130  
64/64 - 132s - loss: 0.2619 - accuracy: 0.9148 - val\_loss: 0.5344 - val\_accuracy: 0.8367  
- 132s/epoch - 2s/step  
Epoch 42/130  
64/64 - 131s - loss: 0.2074 - accuracy: 0.9318 - val\_loss: 0.5965 - val\_accuracy: 0.7912  
- 131s/epoch - 2s/step  
Epoch 43/130  
64/64 - 132s - loss: 0.2407 - accuracy: 0.9276 - val\_loss: 0.3261 - val\_accuracy: 0.8973  
- 132s/epoch - 2s/step  
Epoch 44/130  
64/64 - 132s - loss: 0.2090 - accuracy: 0.9339 - val\_loss: 0.3557 - val\_accuracy: 0.8939  
- 132s/epoch - 2s/step  
Epoch 45/130  
64/64 - 132s - loss: 0.2254 - accuracy: 0.9290 - val\_loss: 0.6574 - val\_accuracy: 0.8300  
- 132s/epoch - 2s/step

Epoch 46/130  
64/64 - 132s - loss: 0.2261 - accuracy: 0.9283 - val\_loss: 0.5331 - val\_accuracy: 0.8384  
- 132s/epoch - 2s/step

Epoch 47/130  
64/64 - 132s - loss: 0.2229 - accuracy: 0.9261 - val\_loss: 0.5187 - val\_accuracy: 0.8401  
- 132s/epoch - 2s/step

Epoch 48/130  
64/64 - 132s - loss: 0.2136 - accuracy: 0.9382 - val\_loss: 0.3531 - val\_accuracy: 0.9007  
- 132s/epoch - 2s/step

Epoch 49/130  
64/64 - 131s - loss: 0.1893 - accuracy: 0.9382 - val\_loss: 0.3899 - val\_accuracy: 0.8788  
- 131s/epoch - 2s/step

Epoch 50/130  
64/64 - 131s - loss: 0.1976 - accuracy: 0.9425 - val\_loss: 0.2834 - val\_accuracy: 0.9057  
- 131s/epoch - 2s/step

Epoch 51/130  
64/64 - 132s - loss: 0.1799 - accuracy: 0.9347 - val\_loss: 0.3807 - val\_accuracy: 0.8788  
- 132s/epoch - 2s/step

Epoch 52/130  
64/64 - 132s - loss: 0.1759 - accuracy: 0.9432 - val\_loss: 0.4007 - val\_accuracy: 0.8704  
- 132s/epoch - 2s/step

Epoch 53/130  
64/64 - 132s - loss: 0.2271 - accuracy: 0.9297 - val\_loss: 0.3641 - val\_accuracy: 0.8822  
- 132s/epoch - 2s/step

Epoch 54/130  
64/64 - 131s - loss: 0.1756 - accuracy: 0.9453 - val\_loss: 0.2993 - val\_accuracy: 0.9007  
- 131s/epoch - 2s/step

Epoch 55/130  
64/64 - 130s - loss: 0.1854 - accuracy: 0.9438 - val\_loss: 0.4212 - val\_accuracy: 0.8636  
- 130s/epoch - 2s/step

Epoch 56/130  
64/64 - 131s - loss: 0.2278 - accuracy: 0.9219 - val\_loss: 0.6634 - val\_accuracy: 0.7896  
- 131s/epoch - 2s/step

Epoch 57/130  
64/64 - 132s - loss: 0.1832 - accuracy: 0.9453 - val\_loss: 0.3681 - val\_accuracy: 0.8788  
- 132s/epoch - 2s/step

Epoch 58/130  
64/64 - 131s - loss: 0.1762 - accuracy: 0.9425 - val\_loss: 0.4339 - val\_accuracy: 0.8653  
- 131s/epoch - 2s/step

Epoch 59/130  
64/64 - 131s - loss: 0.2045 - accuracy: 0.9325 - val\_loss: 0.3876 - val\_accuracy: 0.8737  
- 131s/epoch - 2s/step

Epoch 60/130  
64/64 - 131s - loss: 0.1759 - accuracy: 0.9368 - val\_loss: 0.3223 - val\_accuracy: 0.8939  
- 131s/epoch - 2s/step

Epoch 61/130  
64/64 - 132s - loss: 0.1421 - accuracy: 0.9538 - val\_loss: 0.3640 - val\_accuracy: 0.8973  
- 132s/epoch - 2s/step

Epoch 62/130  
64/64 - 132s - loss: 0.1844 - accuracy: 0.9396 - val\_loss: 0.4474 - val\_accuracy: 0.8687  
- 132s/epoch - 2s/step

Epoch 63/130  
64/64 - 131s - loss: 0.1366 - accuracy: 0.9531 - val\_loss: 0.2716 - val\_accuracy: 0.9091  
- 131s/epoch - 2s/step

Epoch 64/130  
64/64 - 132s - loss: 0.1678 - accuracy: 0.9510 - val\_loss: 0.3233 - val\_accuracy: 0.8990  
- 132s/epoch - 2s/step

Epoch 65/130  
64/64 - 131s - loss: 0.1508 - accuracy: 0.9496 - val\_loss: 0.3612 - val\_accuracy: 0.8771  
- 131s/epoch - 2s/step

Epoch 66/130  
64/64 - 131s - loss: 0.1427 - accuracy: 0.9567 - val\_loss: 0.2512 - val\_accuracy: 0.9141  
- 131s/epoch - 2s/step

Epoch 67/130  
64/64 - 131s - loss: 0.1596 - accuracy: 0.9446 - val\_loss: 0.2841 - val\_accuracy: 0.9057

```
- 131s/epoch - 2s/step
Epoch 68/130
64/64 - 132s - loss: 0.1521 - accuracy: 0.9560 - val_loss: 0.2807 - val_accuracy: 0.9040
- 132s/epoch - 2s/step
Epoch 69/130
64/64 - 131s - loss: 0.1526 - accuracy: 0.9460 - val_loss: 0.2871 - val_accuracy: 0.9074
- 131s/epoch - 2s/step
Epoch 70/130
64/64 - 129s - loss: 0.1524 - accuracy: 0.9510 - val_loss: 1.2978 - val_accuracy: 0.6380
- 129s/epoch - 2s/step
Epoch 71/130
64/64 - 132s - loss: 0.2141 - accuracy: 0.9290 - val_loss: 0.3641 - val_accuracy: 0.8939
- 132s/epoch - 2s/step
Epoch 72/130
64/64 - 132s - loss: 0.1526 - accuracy: 0.9489 - val_loss: 0.3875 - val_accuracy: 0.8822
- 132s/epoch - 2s/step
Epoch 73/130
64/64 - 131s - loss: 0.1503 - accuracy: 0.9531 - val_loss: 0.3018 - val_accuracy: 0.9125
- 131s/epoch - 2s/step
Epoch 74/130
64/64 - 131s - loss: 0.1624 - accuracy: 0.9496 - val_loss: 0.3674 - val_accuracy: 0.8889
- 131s/epoch - 2s/step
Epoch 75/130
64/64 - 131s - loss: 0.1621 - accuracy: 0.9425 - val_loss: 0.3774 - val_accuracy: 0.9024
- 131s/epoch - 2s/step
Epoch 76/130
64/64 - 132s - loss: 0.1433 - accuracy: 0.9517 - val_loss: 0.3527 - val_accuracy: 0.8805
- 132s/epoch - 2s/step
Epoch 77/130
64/64 - 131s - loss: 0.1442 - accuracy: 0.9482 - val_loss: 0.4003 - val_accuracy: 0.8788
- 131s/epoch - 2s/step
Epoch 78/130
64/64 - 132s - loss: 0.1334 - accuracy: 0.9588 - val_loss: 0.3178 - val_accuracy: 0.9007
- 132s/epoch - 2s/step
Epoch 79/130
64/64 - 131s - loss: 0.1120 - accuracy: 0.9595 - val_loss: 0.3861 - val_accuracy: 0.8973
- 131s/epoch - 2s/step
Epoch 80/130
64/64 - 132s - loss: 0.1507 - accuracy: 0.9538 - val_loss: 0.2691 - val_accuracy: 0.9226
- 132s/epoch - 2s/step
Epoch 81/130
64/64 - 131s - loss: 0.1349 - accuracy: 0.9517 - val_loss: 0.3382 - val_accuracy: 0.8939
- 131s/epoch - 2s/step
Epoch 82/130
64/64 - 132s - loss: 0.1417 - accuracy: 0.9560 - val_loss: 0.2655 - val_accuracy: 0.9158
- 132s/epoch - 2s/step
Epoch 83/130
64/64 - 131s - loss: 0.1300 - accuracy: 0.9503 - val_loss: 0.3167 - val_accuracy: 0.9074
- 131s/epoch - 2s/step
Epoch 84/130
64/64 - 131s - loss: 0.1265 - accuracy: 0.9624 - val_loss: 0.4131 - val_accuracy: 0.8956
- 131s/epoch - 2s/step
Epoch 85/130
64/64 - 133s - loss: 0.1410 - accuracy: 0.9553 - val_loss: 0.2897 - val_accuracy: 0.9192
- 133s/epoch - 2s/step
Epoch 86/130
64/64 - 130s - loss: 0.1963 - accuracy: 0.9438 - val_loss: 0.4191 - val_accuracy: 0.8636
- 130s/epoch - 2s/step
Epoch 87/130
64/64 - 132s - loss: 0.1323 - accuracy: 0.9574 - val_loss: 0.2988 - val_accuracy: 0.9226
- 132s/epoch - 2s/step
Epoch 88/130
64/64 - 132s - loss: 0.1248 - accuracy: 0.9631 - val_loss: 0.3291 - val_accuracy: 0.9108
- 132s/epoch - 2s/step
Epoch 89/130
```

64/64 - 130s - loss: 0.2033 - accuracy: 0.9402 - val\_loss: 0.3383 - val\_accuracy: 0.8973  
- 130s/epoch - 2s/step  
Epoch 90/130  
64/64 - 132s - loss: 0.1224 - accuracy: 0.9588 - val\_loss: 0.3174 - val\_accuracy: 0.9074  
- 132s/epoch - 2s/step  
Epoch 91/130  
64/64 - 131s - loss: 0.1206 - accuracy: 0.9666 - val\_loss: 0.3652 - val\_accuracy: 0.8855  
- 131s/epoch - 2s/step  
Epoch 92/130  
64/64 - 131s - loss: 0.1169 - accuracy: 0.9616 - val\_loss: 0.3052 - val\_accuracy: 0.9108  
- 131s/epoch - 2s/step  
Epoch 93/130  
64/64 - 132s - loss: 0.0987 - accuracy: 0.9673 - val\_loss: 0.3171 - val\_accuracy: 0.9175  
- 132s/epoch - 2s/step  
Epoch 94/130  
64/64 - 131s - loss: 0.1456 - accuracy: 0.9560 - val\_loss: 0.2751 - val\_accuracy: 0.9040  
- 131s/epoch - 2s/step  
Epoch 95/130  
64/64 - 132s - loss: 0.1102 - accuracy: 0.9645 - val\_loss: 0.3257 - val\_accuracy: 0.9091  
- 132s/epoch - 2s/step  
Epoch 96/130  
64/64 - 132s - loss: 0.0920 - accuracy: 0.9723 - val\_loss: 0.4270 - val\_accuracy: 0.8906  
- 132s/epoch - 2s/step  
Epoch 97/130  
64/64 - 131s - loss: 0.0995 - accuracy: 0.9645 - val\_loss: 0.2515 - val\_accuracy: 0.9242  
- 131s/epoch - 2s/step  
Epoch 98/130  
64/64 - 132s - loss: 0.1240 - accuracy: 0.9609 - val\_loss: 0.2359 - val\_accuracy: 0.9242  
- 132s/epoch - 2s/step  
Epoch 99/130  
64/64 - 132s - loss: 0.1062 - accuracy: 0.9652 - val\_loss: 0.2522 - val\_accuracy: 0.9226  
- 132s/epoch - 2s/step  
Epoch 100/130  
64/64 - 131s - loss: 0.1205 - accuracy: 0.9638 - val\_loss: 0.2524 - val\_accuracy: 0.9276  
- 131s/epoch - 2s/step  
Epoch 101/130  
64/64 - 132s - loss: 0.1409 - accuracy: 0.9616 - val\_loss: 0.3322 - val\_accuracy: 0.8973  
- 132s/epoch - 2s/step  
Epoch 102/130  
64/64 - 132s - loss: 0.0887 - accuracy: 0.9737 - val\_loss: 0.2346 - val\_accuracy: 0.9242  
- 132s/epoch - 2s/step  
Epoch 103/130  
64/64 - 132s - loss: 0.0937 - accuracy: 0.9716 - val\_loss: 0.2509 - val\_accuracy: 0.9276  
- 132s/epoch - 2s/step  
Epoch 104/130  
64/64 - 132s - loss: 0.1213 - accuracy: 0.9609 - val\_loss: 0.3402 - val\_accuracy: 0.8990  
- 132s/epoch - 2s/step  
Epoch 105/130  
64/64 - 132s - loss: 0.1268 - accuracy: 0.9609 - val\_loss: 0.3253 - val\_accuracy: 0.8990  
- 132s/epoch - 2s/step  
Epoch 106/130  
64/64 - 131s - loss: 0.1166 - accuracy: 0.9631 - val\_loss: 0.2930 - val\_accuracy: 0.9040  
- 131s/epoch - 2s/step  
Epoch 107/130  
64/64 - 131s - loss: 0.1152 - accuracy: 0.9624 - val\_loss: 0.4834 - val\_accuracy: 0.8704  
- 131s/epoch - 2s/step  
Epoch 108/130  
64/64 - 132s - loss: 0.1341 - accuracy: 0.9553 - val\_loss: 0.3910 - val\_accuracy: 0.8737  
- 132s/epoch - 2s/step  
Epoch 109/130  
64/64 - 132s - loss: 0.1029 - accuracy: 0.9638 - val\_loss: 0.4579 - val\_accuracy: 0.8687  
- 132s/epoch - 2s/step  
Epoch 110/130  
64/64 - 131s - loss: 0.1292 - accuracy: 0.9638 - val\_loss: 0.3574 - val\_accuracy: 0.9007  
- 131s/epoch - 2s/step

```

Epoch 111/130
64/64 - 129s - loss: 0.1178 - accuracy: 0.9603 - val_loss: 0.5041 - val_accuracy: 0.8569
- 129s/epoch - 2s/step
Epoch 112/130
64/64 - 132s - loss: 0.1224 - accuracy: 0.9595 - val_loss: 0.2953 - val_accuracy: 0.9158
- 132s/epoch - 2s/step
Epoch 113/130
64/64 - 132s - loss: 0.1012 - accuracy: 0.9652 - val_loss: 0.4072 - val_accuracy: 0.8704
- 132s/epoch - 2s/step
Epoch 114/130
64/64 - 131s - loss: 0.0997 - accuracy: 0.9624 - val_loss: 0.3128 - val_accuracy: 0.9209
- 131s/epoch - 2s/step
Epoch 115/130
64/64 - 132s - loss: 0.1507 - accuracy: 0.9482 - val_loss: 0.2503 - val_accuracy: 0.9226
- 132s/epoch - 2s/step
Epoch 116/130
64/64 - 131s - loss: 0.0997 - accuracy: 0.9680 - val_loss: 0.2788 - val_accuracy: 0.9057
- 131s/epoch - 2s/step
Epoch 117/130
64/64 - 135s - loss: 0.1060 - accuracy: 0.9624 - val_loss: 0.3079 - val_accuracy: 0.9057
- 135s/epoch - 2s/step
Epoch 118/130
64/64 - 131s - loss: 0.1167 - accuracy: 0.9595 - val_loss: 0.4111 - val_accuracy: 0.8721
- 131s/epoch - 2s/step
Epoch 119/130
64/64 - 132s - loss: 0.0861 - accuracy: 0.9695 - val_loss: 0.2236 - val_accuracy: 0.9192
- 132s/epoch - 2s/step
Epoch 120/130
64/64 - 131s - loss: 0.0919 - accuracy: 0.9688 - val_loss: 0.2695 - val_accuracy: 0.9226
- 131s/epoch - 2s/step
Epoch 121/130
64/64 - 132s - loss: 0.0946 - accuracy: 0.9723 - val_loss: 0.3165 - val_accuracy: 0.9209
- 132s/epoch - 2s/step
Epoch 122/130
64/64 - 132s - loss: 0.0908 - accuracy: 0.9666 - val_loss: 0.3157 - val_accuracy: 0.9057
- 132s/epoch - 2s/step
Epoch 123/130
64/64 - 130s - loss: 0.1439 - accuracy: 0.9524 - val_loss: 0.5036 - val_accuracy: 0.8552
- 130s/epoch - 2s/step
Epoch 124/130
64/64 - 131s - loss: 0.0957 - accuracy: 0.9702 - val_loss: 0.3756 - val_accuracy: 0.9007
- 131s/epoch - 2s/step
Epoch 125/130
64/64 - 133s - loss: 0.1203 - accuracy: 0.9673 - val_loss: 0.3178 - val_accuracy: 0.9040
- 133s/epoch - 2s/step
Epoch 126/130
64/64 - 133s - loss: 0.0956 - accuracy: 0.9688 - val_loss: 0.2325 - val_accuracy: 0.9327
- 133s/epoch - 2s/step
Epoch 127/130
64/64 - 132s - loss: 0.0888 - accuracy: 0.9744 - val_loss: 0.3974 - val_accuracy: 0.8923
- 132s/epoch - 2s/step
Epoch 128/130
64/64 - 132s - loss: 0.1059 - accuracy: 0.9645 - val_loss: 0.3708 - val_accuracy: 0.8990
- 132s/epoch - 2s/step
Epoch 129/130
64/64 - 132s - loss: 0.1028 - accuracy: 0.9680 - val_loss: 0.3336 - val_accuracy: 0.9074
- 132s/epoch - 2s/step
Epoch 130/130
64/64 - 132s - loss: 0.1001 - accuracy: 0.9645 - val_loss: 0.3006 - val_accuracy: 0.9108
- 132s/epoch - 2s/step
Time: 4:45:11.459956

```

```

In [17]: score = CloudMobiNet_model.evaluate(train_generator, verbose=0)
          print("Accuracy: %.2f%%" % (score[1]*100))

```

Accuracy: 97.45%

```
In [18]: CloudMobiNet_model.save('Cloud_MOBINET.h5')
```

```
In [19]: CloudMobiNet_model.save('Cloud_MOBINET.hdf5')
```

```
In [20]: CloudMobiNet_model.metrics_names  
score
```

```
Out[20]: [0.07623911648988724, 0.974483072757721]
```

```
In [21]: score
```

```
Out[21]: [0.07623911648988724, 0.974483072757721]
```

```
In [22]: loss = history.history['loss']  
val_loss = history.history['val_loss']  
epochs = range(1, len(loss) + 1)  
plt.plot(epochs, loss, 'r', label='Training loss')  
plt.plot(epochs, val_loss, 'b', label='Validation loss')  
plt.title('Training and validation loss')  
plt.xlabel('Epochs')  
plt.ylabel('Loss')  
plt.legend()  
plt.show()  
  
acc = history.history['accuracy']  
val_acc = history.history['val_accuracy']  
plt.plot(epochs, acc, 'r', label='Training acc')  
plt.plot(epochs, val_acc, 'b', label='Validation acc')  
plt.title('Training and validation accuracy')  
plt.xlabel('Epochs')  
plt.ylabel('Accuracy')  
plt.legend()  
plt.show()
```

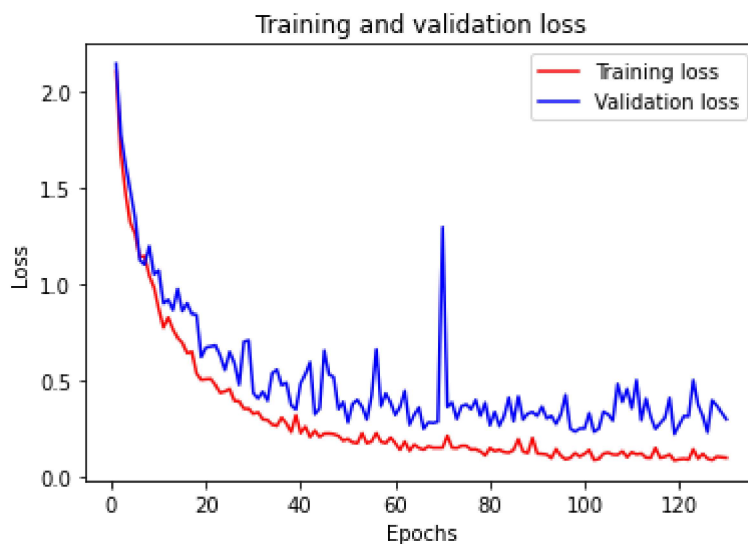

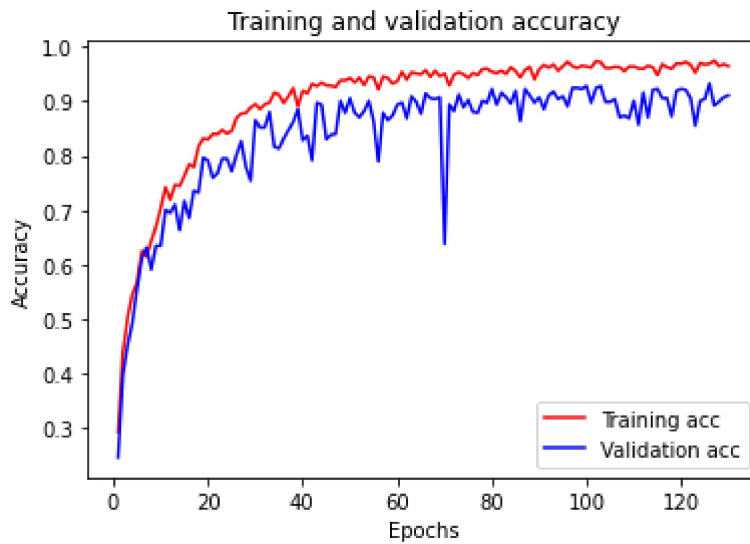

```
In [23]: test_path = 'C:/Users/GyasiEmmanuelKwabena/Desktop/Dataset/test'
```

```
In [24]: test_batches = ImageDataGenerator(preprocessing_function=tf.keras.applications.mobilenet_v2.preprocess_input,
    directory=test_path, target_size=(224,224), batch_size=110, shuffle=False)
```

Found 110 images belonging to 11 classes.

```
In [25]: class_labels = ["Ac", "As", "Cb", "Cc", "Ci", "Cs", "Ct", "Cu", "Ns", "Sc", "St"]
    from sklearn.metrics import classification_report
    test_labels = test_batches.classes
    predictions = CloudMobiNet_model.predict(test_batches, steps=len(test_batches), verbose=0)
    y_pred = np.argmax(predictions, axis=-1)
    print(classification_report(test_labels, y_pred, target_names=class_labels))
```

|              | precision | recall | f1-score | support |
|--------------|-----------|--------|----------|---------|
| Ac           | 1.00      | 1.00   | 1.00     | 10      |
| As           | 1.00      | 1.00   | 1.00     | 10      |
| Cb           | 1.00      | 0.90   | 0.95     | 10      |
| Cc           | 1.00      | 0.90   | 0.95     | 10      |
| Ci           | 0.91      | 1.00   | 0.95     | 10      |
| Cs           | 0.91      | 1.00   | 0.95     | 10      |
| Ct           | 1.00      | 1.00   | 1.00     | 10      |
| Cu           | 1.00      | 1.00   | 1.00     | 10      |
| Ns           | 1.00      | 0.80   | 0.89     | 10      |
| Sc           | 1.00      | 1.00   | 1.00     | 10      |
| St           | 0.83      | 1.00   | 0.91     | 10      |
| accuracy     |           |        | 0.96     | 110     |
| macro avg    | 0.97      | 0.96   | 0.96     | 110     |
| weighted avg | 0.97      | 0.96   | 0.96     | 110     |

```
In [26]: test_labels = test_batches.classes
```

```
In [27]: predictions = CloudMobiNet_model.predict(x=test_batches, steps=len(test_batches), verbose=0)
```

```
In [28]: cm = confusion_matrix(y_true=test_batches.classes, y_pred= np.argmax(predictions,axis=1
```

```
In [29]: #Plot the confusion matrix. Set Normalize = True/False

def plot_confusion_matrix(cm, classes, normalize=True, title='Confusion matrix', cmap=p
    """
    This function prints and plots the confusion matrix.
    Normalization can be applied by setting `normalize=True`.
    """
    plt.figure(figsize=(8,6))

    plt.imshow(cm, interpolation='nearest', cmap=cmap)
    plt.title(title)
    plt.colorbar()

    tick_marks = np.arange(len(classes))
    plt.xticks(tick_marks, classes, rotation=45)
    plt.yticks(tick_marks, classes)

    if normalize:
        cm = cm.astype('float') / cm.sum(axis=1)[:, np.newaxis]
        cm = np.around(cm, decimals=2)
        cm[np.isnan(cm)] = 0.0

        print("Normalized confusion matrix")
    else:
        print('Confusion matrix, without normalization')

    thresh = cm.max() / 2.

    for i, j in itertools.product(range(cm.shape[0]), range(cm.shape[1])):
        plt.text(j, i, cm[i, j],
                horizontalalignment="center",
                fontsize="15",
                color="white" if cm[i, j] > thresh else "black")
```



```
plt.tight_layout()

plt.ylabel('True label')

plt.xlabel('Predicted label')
```

```
In [30]: cm_plot_labels = ["Ac", "As", "Cb", "Cc", "Ci", "Cs", "Ct", "Cu", "Ns", "Sc", "St"]
plot_confusion_matrix(cm=cm, classes=cm_plot_labels, title='Confusion Matrix')
```

Normalized confusion matrix

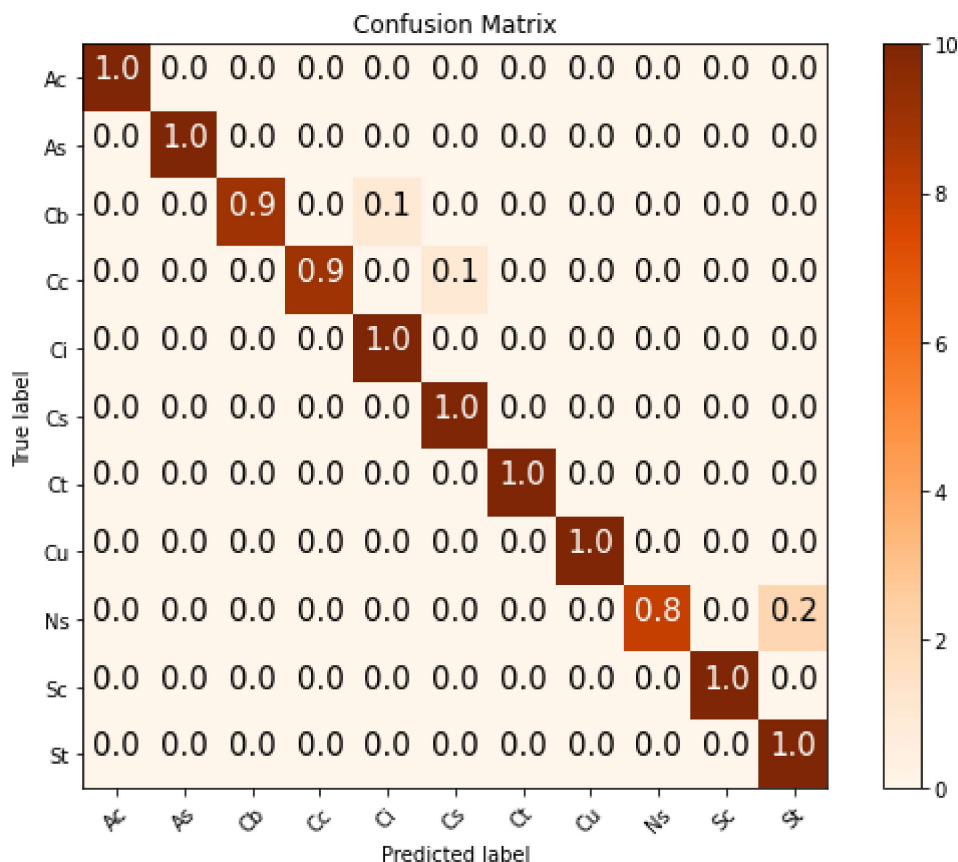

```
In [31]: testX, testy = test_batches.next()
print('test shape=%s, min=%.3f, max=%.3f' % (testX.shape, testX.min(), testX.max()))
```

test shape=(110, 224, 224, 3), min=-1.000, max=1.000

```
In [32]: #making a prediction about our test data

#checking the prediction shape
predictions.shape
```

Out[32]: (110, 11)

```
In [33]: #checking the batch shape
testX.shape
```

Out[33]: (110, 224, 224, 3)

```
In [34]: predictions= CloudMobiNet_model.predict(testX)
```

4/4 [=====] - 3s 622ms/step

```
In [35]: test_loss, test_accuracy = CloudMobiNet_model.evaluate(testX, testy)
```

4/4 [=====] - 2s 548ms/step - loss: 0.1594 - accuracy: 0.9636

```
In [36]: predictions[28]
```

```
Out[36]: array([8.1877010e-07, 2.3667071e-05, 3.0261282e-02, 1.4088984e-04,
          9.5752704e-01, 5.6759247e-05, 2.0696471e-06, 6.3395048e-03,
          3.7166319e-04, 4.5917022e-05, 5.2305181e-03], dtype=float32)
```

```
In [37]: import matplotlib.image as mpimg
```

```
In [38]: plt.figure()
plt.imshow(testX[28])
plt.colorbar()
plt.show()
```

Clipping input data to the valid range for imshow with RGB data ([0..1] for floats or [0..255] for integers).

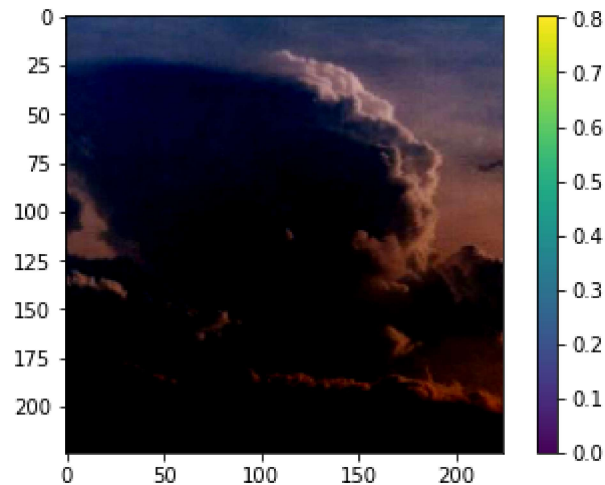

```
In [39]: class_names = ["AltoCumulus", "Altostratus", "Cumulonimbus", "Cirrocumulus", "Cirrus",
```

```
In [40]: # function to plot an image
def plot_image(i, predictions_array, true_label, img):
    predictions_array, true_label, img=predictions_array, true_label[i], img[i]
    plt.grid(False)
    plt.xticks([])
    plt.yticks([])

    plt.imshow(img, cmap=plt.cm.gray)

    predicted_label = np.argmax(predictions_array)
    if predicted_label==true_label:
        color='green'
```

```

plt.xlabel("{} {:.20f}% ({})" .format(class_names[predicted_label],
                                     100*np.max(predictions_array),
                                     class_names[true_label]),
        color=color)

else:
    color='red'
    plt.xlabel("{} {:.20f}% ({})" .format(class_names[predicted_label],
                                     100*np.max(predictions_array),
                                     class_names[true_label]),
        color=color)

#functions to create bar plot of the predictions
def plot_value_array(i, predictions_array, true_label):
    predictions_array, true_label = predictions_array, true_label[i]
    plt.grid(False)
    plt.xticks(range(11))
    plt.yticks([])
    thisplot = plt.bar(range(11), predictions_array, color="#777777")
    plt.ylim([0, 1])
    predicted_label=np.argmax(predictions_array)

    thisplot[predicted_label].set_color('red')
    thisplot[true_label].set_color('green')

```

In [41]:

```

i=27
plt.figure(figsize=(6,3))
plt.subplot(1,2,1)
plot_image(i, predictions[i], test_labels, testX)
plt.subplot(1,2,2)
plot_value_array(i, predictions[i], test_labels)
plt.show()

```

Clipping input data to the valid range for imshow with RGB data ([0..1] for floats or [0..255] for integers).

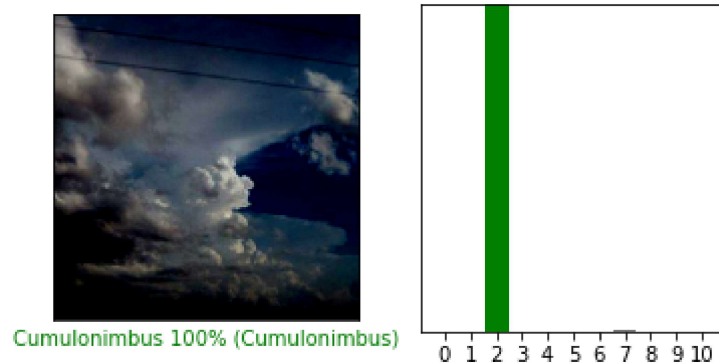

In [42]:

```
predictions[35]
```

```
Out[42]: array([5.3586769e-03, 8.9163244e-02, 5.3298902e-07, 8.9823407e-01,
                6.7059938e-03, 2.2159831e-04, 3.5701366e-06, 1.0728238e-06,
                3.7971606e-07, 2.4805779e-05, 2.8608745e-04], dtype=float32)
```

In [43]:

```

for i in range(11):
    plt.figure(figsize=(6,3))
    plt.subplot(1,2,1)
    plot_image(i, predictions[i], test_labels, testX)

```

```
plt.subplot(1,2,2)
plot_value_array(i, predictions[i], test_labels)
plt.show()
```

Clipping input data to the valid range for imshow with RGB data ([0..1] for floats or [0..255] for integers).

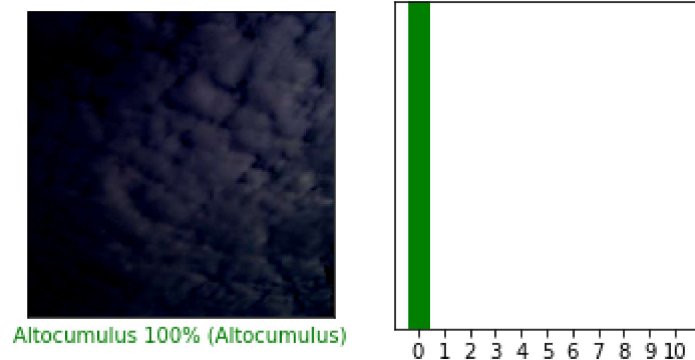

Clipping input data to the valid range for imshow with RGB data ([0..1] for floats or [0..255] for integers).

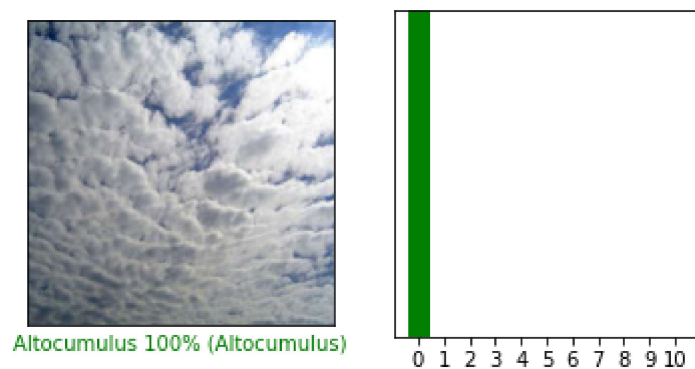

Clipping input data to the valid range for imshow with RGB data ([0..1] for floats or [0..255] for integers).

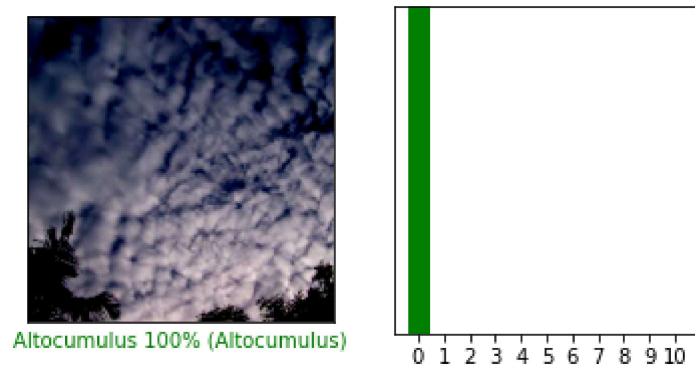

Clipping input data to the valid range for imshow with RGB data ([0..1] for floats or [0..255] for integers).

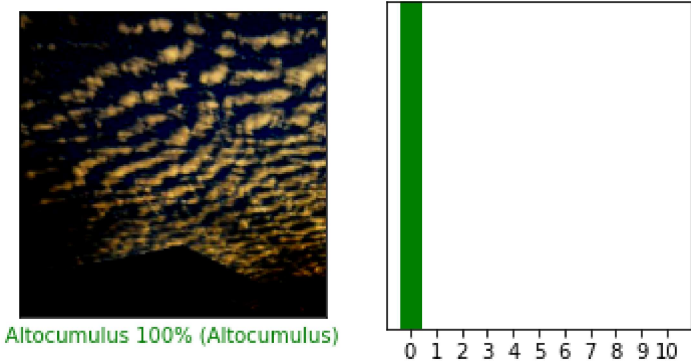

Clipping input data to the valid range for imshow with RGB data ([0..1] for floats or [0..255] for integers).

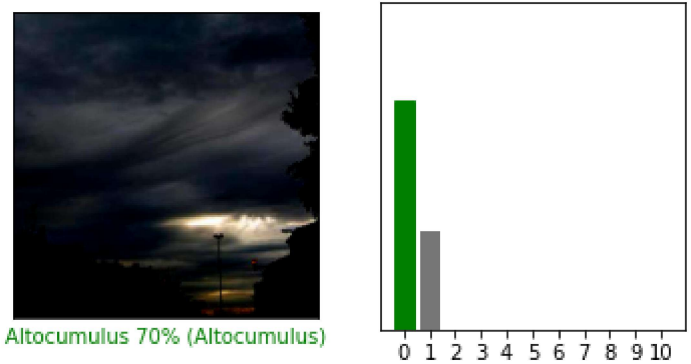

Clipping input data to the valid range for imshow with RGB data ([0..1] for floats or [0..255] for integers).

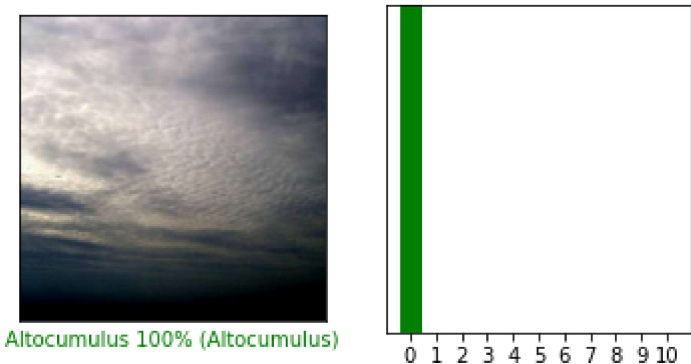

Clipping input data to the valid range for imshow with RGB data ([0..1] for floats or [0..255] for integers).

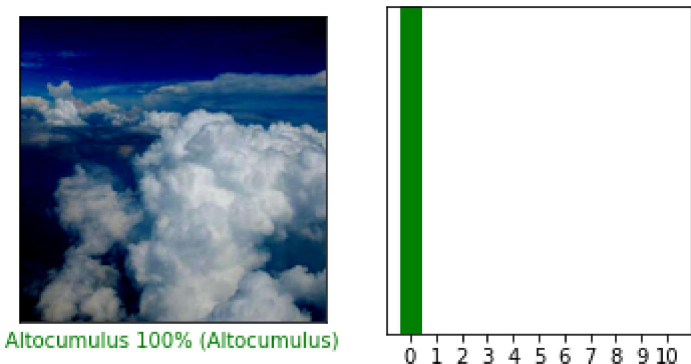

Clipping input data to the valid range for imshow with RGB data ([0..1] for floats or [0..255] for integers).

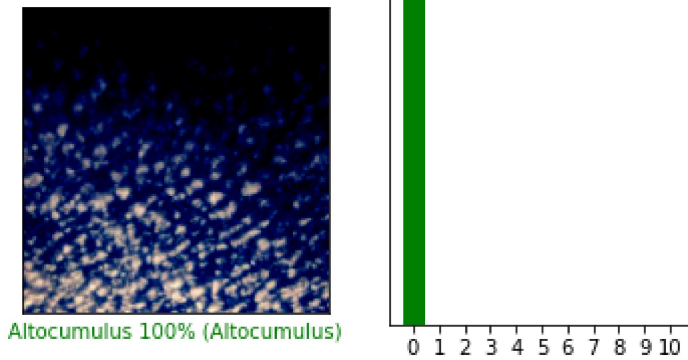

Clipping input data to the valid range for imshow with RGB data ([0..1] for floats or [0..255] for integers).

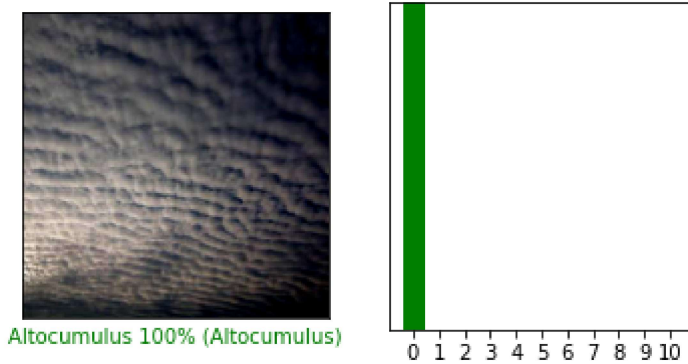

Clipping input data to the valid range for imshow with RGB data ([0..1] for floats or [0..255] for integers).

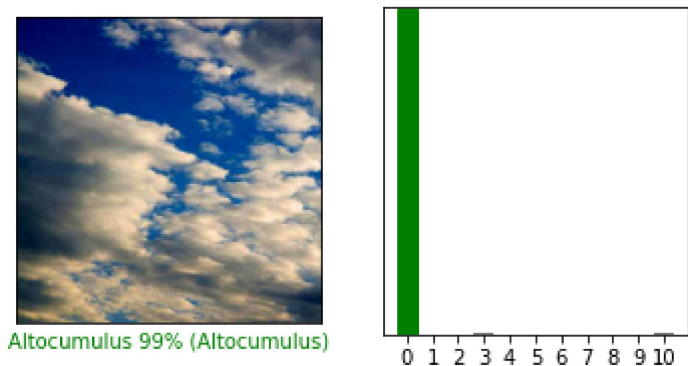

Clipping input data to the valid range for imshow with RGB data ([0..1] for floats or [0..255] for integers).

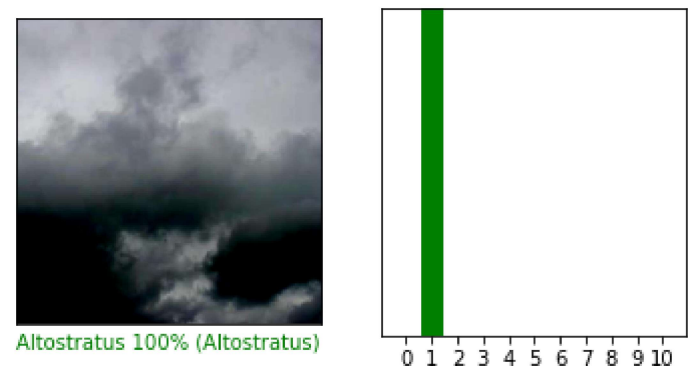

```
In [44]: i=65
plt.figure(figsize=(6,3))
plt.subplot(1,2,1)
```



```

plot_image(i, predictions[i], test_labels, testX)
plt.subplot(1,2,2)
plot_value_array(i, predictions[i], test_labels)
plt.show()

```

Clipping input data to the valid range for imshow with RGB data ([0..1] for floats or [0..255] for integers).

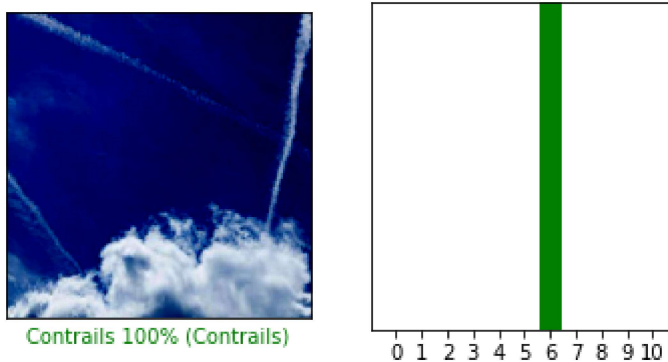

```

In [45]: predicted_classes = CloudMobiNet_model.predict(x=test_batches, steps=len(test_batches),
predicted_classes = np.argmax(np.round(predicted_classes),axis=1)
predicted_classes.shape, y_pred.shape
#print(type(predictions), predictions.shape)

```

Out[45]: ((110,), (110,))

```

In [46]: plt.figure(figsize=(10, 10))
correct = np.where(predicted_classes==y_pred)[0]
print ("Found %d correct labels" % len(correct))
for i, correct in enumerate(correct[:9]):
    plt.subplot(3,3,i+1)
    plt.imshow(testX[correct], cmap='gray', interpolation='none')
    plt.title("Predicted {}, Class {}".format(predicted_classes[correct], y_pred[correct]))
plt.tight_layout()

```

Clipping input data to the valid range for imshow with RGB data ([0..1] for floats or [0..255] for integers).

Clipping input data to the valid range for imshow with RGB data ([0..1] for floats or [0..255] for integers).

Clipping input data to the valid range for imshow with RGB data ([0..1] for floats or [0..255] for integers).

Found 110 correct labels

Clipping input data to the valid range for imshow with RGB data ([0..1] for floats or [0..255] for integers).

Clipping input data to the valid range for imshow with RGB data ([0..1] for floats or [0..255] for integers).

Clipping input data to the valid range for imshow with RGB data ([0..1] for floats or [0..255] for integers).

Clipping input data to the valid range for imshow with RGB data ([0..1] for floats or [0..255] for integers).

Clipping input data to the valid range for imshow with RGB data ([0..1] for floats or [0..255] for integers).

Clipping input data to the valid range for imshow with RGB data ([0..1] for floats or [0..255] for integers).

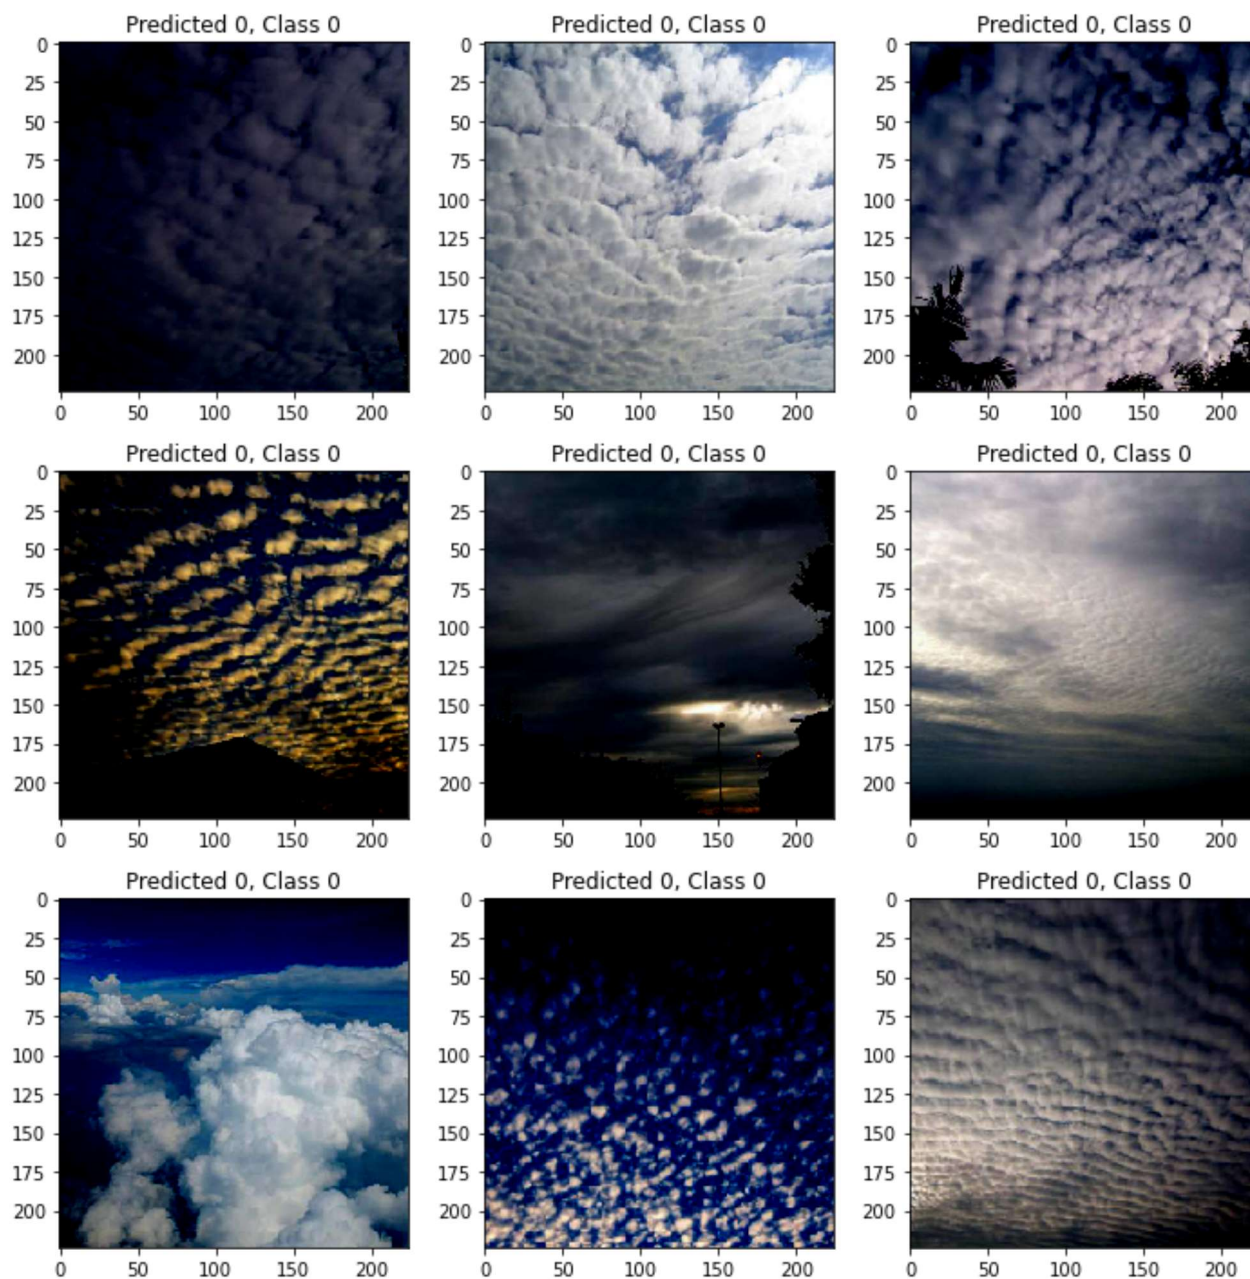

In [47]:

```
plt.figure()
plt.imshow(testX[60])
plt.colorbar()
plt.show()
```

Clipping input data to the valid range for imshow with RGB data ([0..1] for floats or [0..255] for integers).



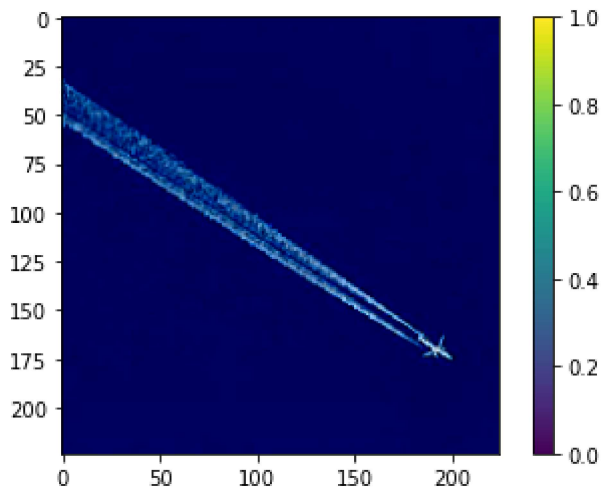

```
In [48]: #printing the first element from predicted data
pred=CloudMobiNet_model.predict(test_batches)
print(pred[60])
#printing the index of
print('Index:', np.argmax(pred[60]))
```

```
1/1 [=====] - 3s 3s/step
[1.6036435e-12 2.3826804e-13 4.7321495e-13 2.5269540e-09 3.1627598e-12
 8.7350249e-12 1.0000000e+00 7.8760999e-12 1.7956898e-13 1.5294960e-11
 4.9321798e-08]
Index: 6
```

```
In [49]: i=16
plt.figure(figsize=(6,3))
plt.subplot(1,2,1)
plot_image(i, predictions[i], test_labels, testX)
plt.subplot(1,2,2)
plot_value_array(i, predictions[i], test_labels)
plt.show()
```

Clipping input data to the valid range for imshow with RGB data ([0..1] for floats or [0..255] for integers).

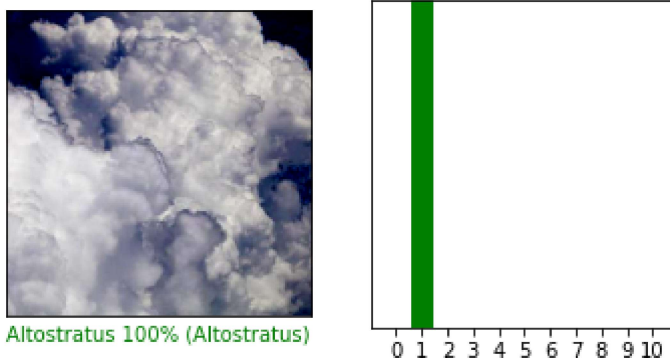

```
In [50]: predictions[16]
```

```
Out[50]: array([2.3733778e-04, 9.9904412e-01, 1.9174904e-04, 6.2474978e-06,
 2.0500877e-09, 7.5997235e-07, 6.6262295e-08, 1.9544762e-04,
 1.1830035e-06, 8.7253291e-08, 3.2299891e-04], dtype=float32)
```

```
In [51]: i=85
plt.figure(figsize=(6,3))
plt.subplot(1,2,1)
plot_image(i, predictions[i], test_labels, testX)
plt.subplot(1,2,2)
plot_value_array(i, predictions[i], test_labels)
plt.show()
```

Clipping input data to the valid range for imshow with RGB data ([0..1] for floats or [0..255] for integers).

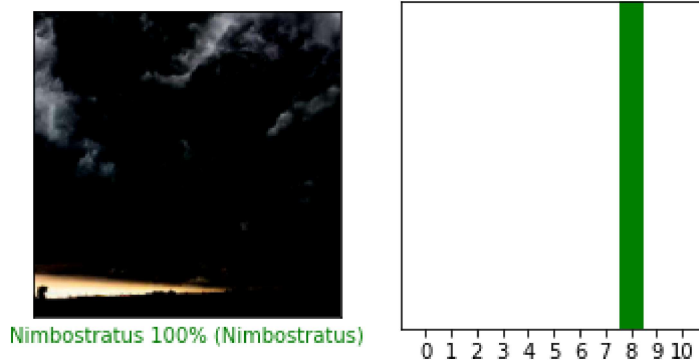

```
In [52]: i=10
plt.figure(figsize=(6,3))
plt.subplot(1,2,1)
plot_image(i, predictions[i], test_labels, testX)
plt.subplot(1,2,2)
plot_value_array(i, predictions[i], test_labels)
plt.show()
```

Clipping input data to the valid range for imshow with RGB data ([0..1] for floats or [0..255] for integers).

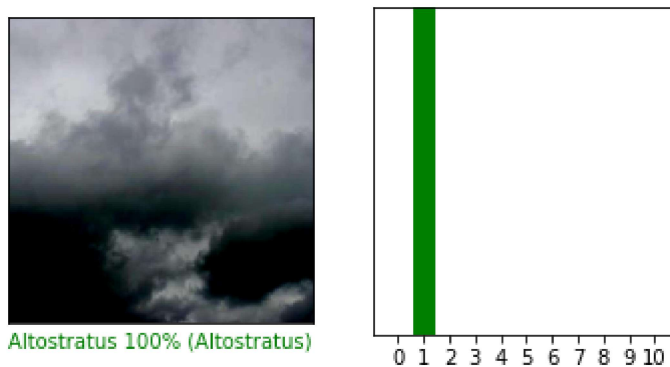

```
In [53]: i=109
plt.figure(figsize=(6,3))
plt.subplot(1,2,1)
plot_image(i, predictions[i], test_labels, testX)
plt.subplot(1,2,2)
plot_value_array(i, predictions[i], test_labels)
plt.show()
```

Clipping input data to the valid range for imshow with RGB data ([0..1] for floats or [0..255] for integers).

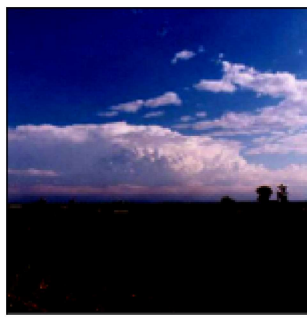

Stratus 100% (Stratus)

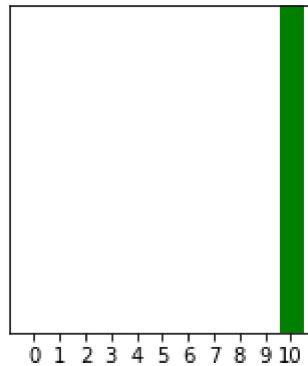

In [54]:

```
predictions = CloudMobiNet_model.predict(test_batches)
for i in range(len(test_batches)):
    print("X=%s, Predicted=%s" % (test_batches[i], predictions[i]))
```

```
1/1 [=====] - 3s 3s/step
X=(array([[[-0.09019607, -0.0745098 , 0.09019613],
          [-0.09803921, -0.08235294, 0.082353  ],
          [-0.11372548, -0.09803921, 0.06666672],
          ...,
          [ 0.14509809,  0.1686275 , 0.28627455],
          [ 0.14509809,  0.1686275 , 0.28627455],
          [ 0.13725495,  0.16078436, 0.27843142]],

          [[-0.09019607, -0.0745098 , 0.09019613],
          [-0.09803921, -0.08235294, 0.082353  ],
          [-0.10588235, -0.09019607, 0.07450986],
          ...,
          [ 0.14509809,  0.1686275 , 0.28627455],
          [ 0.14509809,  0.1686275 , 0.28627455],
          [ 0.13725495,  0.16078436, 0.27843142]],

          [[-0.09803921, -0.08235294, 0.082353  ],
          [-0.09803921, -0.08235294, 0.082353  ],
          [-0.09803921, -0.08235294, 0.082353  ],
          ...,
          [ 0.14509809,  0.1686275 , 0.28627455],
          [ 0.13725495,  0.16078436, 0.27843142],
          [ 0.14509809,  0.1686275 , 0.28627455]],

          ...,

          [[-0.372549 , -0.4980392 , -0.69411767],
          [-0.27058822, -0.36470586, -0.5529412 ],
          [-0.09019607, -0.14509803, -0.29411763],
          ...,
          [-0.18431371, -0.1372549 , 0.03529418],
          [-0.17647058, -0.12156862, 0.00392163],
          [-0.11372548, -0.05098039, 0.05098045]],

          [[-0.372549 , -0.4980392 , -0.69411767],
          [-0.21568626, -0.3098039 , -0.4980392 ],
          [-0.0745098 , -0.12941176, -0.27058822],
          ...,
          [-0.26274508, -0.19999999, -0.01960784],
          [-0.02745098,  0.04313731, 0.17647064],
          [-0.09019607, -0.01176471, 0.082353  ]],

          [[-0.04313725, -0.16862744, -0.36470586],
          [-0.06666666, -0.1607843 , -0.3490196 ],
          [-0.0745098 , -0.12941176, -0.27058822],
```

```

... ,
[-0.6392157 , -0.5764706 , -0.3960784 ],
[-0.654902 , -0.58431375, -0.45098037],
[-0.75686276, -0.6784314 , -0.58431375]]],

[[ [ 0.3803922 , 0.45098042, 0.4901961 ],
[ 0.38823533, 0.45882356, 0.49803925],
[ 0.35686278, 0.427451 , 0.4666667 ],
... ,
[ 0.6156863 , 0.7490196 , 0.9529412 ],
[ 0.60784316, 0.7411765 , 0.94509804],
[ 0.5764706 , 0.70980394, 0.9137255 ]],

[ [ 0.4039216 , 0.47450984, 0.5137255 ],
[ 0.39607847, 0.4666667 , 0.5058824 ],
[ 0.34901965, 0.41960788, 0.45882356],
... ,
[ 0.5921569 , 0.7254902 , 0.92941177],
[ 0.58431375, 0.7176471 , 0.92156863],
[ 0.5764706 , 0.70980394, 0.9137255 ]],

[ [ 0.43529415, 0.5058824 , 0.54509807],
[ 0.39607847, 0.4666667 , 0.5058824 ],
[ 0.33333337, 0.4039216 , 0.4431373 ],
... ,
[ 0.58431375, 0.7176471 , 0.92156863],
[ 0.5764706 , 0.70980394, 0.9137255 ],
[ 0.5686275 , 0.7019608 , 0.90588236]],

... ,

[ [ 0.26274514, 0.30196083, 0.33333337],
[ 0.27843142, 0.3176471 , 0.34901965],
[ 0.2941177 , 0.33333337, 0.36470592],
... ,
[ 0.62352943, 0.6627451 , 0.6862745 ],
[ 0.6156863 , 0.654902 , 0.6784314 ],
[ 0.6 , 0.6392157 , 0.6627451 ]],

[ [ 0.24705887, 0.28627455, 0.3176471 ],
[ 0.26274514, 0.30196083, 0.33333337],
[ 0.27843142, 0.3176471 , 0.34901965],
... ,
[ 0.52156866, 0.58431375, 0.6 ],
[ 0.52156866, 0.58431375, 0.6 ],
[ 0.5294118 , 0.5921569 , 0.60784316]],

[ [ 0.24705887, 0.28627455, 0.3176471 ],
[ 0.254902 , 0.2941177 , 0.32549024],
[ 0.26274514, 0.30196083, 0.33333337],
... ,
[ 0.4666667 , 0.5294118 , 0.54509807],
[ 0.427451 , 0.4901961 , 0.5058824 ],
[ 0.43529415, 0.49803925, 0.5137255 ]]],

[[ [ 0.15294123, 0.21568632, 0.3176471 ],
[ 0.12941182, 0.19215691, 0.2941177 ],
[ 0.10588241, 0.1686275 , 0.27058828],
... ,
[-0.32549018, -0.20784312, 0.0196079 ],
[-0.34117645, -0.2235294 , 0.03529418],
[-0.29411763, -0.18431371, 0.10588241]],

```

```

[[ 0.14509809, 0.20784318, 0.30980396],
 [ 0.12156868, 0.18431377, 0.28627455],
 [ 0.09803927, 0.15294123, 0.27843142],
 ...,
 [-0.3490196 , -0.23137254, -0.00392157],
 [-0.3098039 , -0.19215685, 0.06666672],
 [-0.27843136, -0.16862744, 0.12156868]],

[[ 0.12941182, 0.19215691, 0.2941177 ],
 [ 0.11372554, 0.17647064, 0.27843142],
 [ 0.09803927, 0.15294123, 0.27843142],
 ...,
 [-0.20784312, -0.09803921, 0.12941182],
 [-0.21568626, -0.09803921, 0.16078436],
 [-0.34117645, -0.23137254, 0.04313731]],

...,

[[-0.9764706 , -0.9529412 , -1.          ],
 [-1.          , -0.9843137 , -1.          ],
 [-1.          , -0.9843137 , -1.          ],
 ...,
 [-1.          , -0.9843137 , -1.          ],
 [-0.9843137 , -0.96862745, -0.99215686],
 [-0.99215686, -0.9764706 , -1.          ]],

[[-0.64705884, -0.62352943, -0.69411767],
 [-0.94509804, -0.92156863, -0.9764706 ],
 [-0.9843137 , -0.96862745, -1.          ],
 ...,
 [-0.99215686, -0.9764706 , -1.          ],
 [-1.          , -0.9843137 , -1.          ],
 [-0.9764706 , -0.9607843 , -0.9843137 ]],

[[-0.6627451 , -0.6392157 , -0.70980394],
 [-0.5294118 , -0.5058824 , -0.56078434],
 [-0.84313726, -0.827451 , -0.8666667 ],
 ...,
 [-0.9843137 , -0.96862745, -0.99215686],
 [-1.          , -0.99215686, -1.          ],
 [-0.99215686, -0.9764706 , -1.          ]]],

...,

[[[-0.47450978, -0.29411763, -0.15294117],
 [-0.47450978, -0.29411763, -0.15294117],
 [-0.46666664, -0.2862745 , -0.14509803],
 ...,
 [-0.34117645, -0.21568626, -0.11372548],
 [-0.38039213, -0.25490195, -0.15294117],
 [-0.38823527, -0.26274508, -0.1607843 ]],

[[-0.47450978, -0.29411763, -0.15294117],
 [-0.47450978, -0.29411763, -0.15294117],
 [-0.46666664, -0.2862745 , -0.14509803],
 ...,
 [-0.35686272, -0.23137254, -0.12941176],
 [-0.38039213, -0.25490195, -0.15294117],
 [-0.38039213, -0.25490195, -0.15294117]],

[[-0.47450978, -0.29411763, -0.15294117],
 [-0.47450978, -0.29411763, -0.15294117],
 [-0.47450978, -0.29411763, -0.15294117],

```

```

...,
[-0.34117645, -0.21568626, -0.11372548],
[-0.35686272, -0.23137254, -0.12941176],
[-0.32549018, -0.19999999, -0.09803921]],

...,

[[-0.64705884, -0.6313726 , -0.6392157 ],
 [-0.64705884, -0.6313726 , -0.6392157 ],
 [-0.654902 , -0.6392157 , -0.64705884],
 ...,
 [-0.6156863 , -0.6 , -0.62352943],
 [-0.6156863 , -0.6 , -0.62352943],
 [-0.6156863 , -0.6 , -0.62352943]],

[[-0.6313726 , -0.6156863 , -0.62352943],
 [-0.6313726 , -0.6156863 , -0.62352943],
 [-0.6313726 , -0.6156863 , -0.62352943],
 ...,
 [-0.6313726 , -0.6156863 , -0.6392157 ],
 [-0.62352943, -0.60784316, -0.6313726 ],
 [-0.60784316, -0.5921569 , -0.6156863 ]],

[[-0.6392157 , -0.62352943, -0.6313726 ],
 [-0.6392157 , -0.62352943, -0.6313726 ],
 [-0.64705884, -0.6313726 , -0.6392157 ],
 ...,
 [-0.6392157 , -0.62352943, -0.64705884],
 [-0.62352943, -0.60784316, -0.6313726 ],
 [-0.6 , -0.58431375, -0.60784316]]],

[[[ 0.427451 , 0.45098042, 0.4901961 ],
 [ 0.41960788, 0.4431373 , 0.48235297],
 [ 0.41960788, 0.4431373 , 0.48235297],
 ...,
 [ 0.41960788, 0.41960788, 0.48235297],
 [ 0.427451 , 0.427451 , 0.4901961 ],
 [ 0.4431373 , 0.4431373 , 0.5058824 ]],

[[ 0.43529415, 0.45882356, 0.49803925],
 [ 0.427451 , 0.45098042, 0.4901961 ],
 [ 0.41960788, 0.4431373 , 0.48235297],
 ...,
 [ 0.33333337, 0.33333337, 0.39607847],
 [ 0.34901965, 0.34901965, 0.41176474],
 [ 0.37254906, 0.37254906, 0.43529415]],

[[ 0.4431373 , 0.4666667 , 0.5058824 ],
 [ 0.41960788, 0.4431373 , 0.48235297],
 [ 0.41960788, 0.4431373 , 0.48235297],
 ...,
 [ 0.3176471 , 0.3176471 , 0.3803922 ],
 [ 0.35686278, 0.35686278, 0.41960788],
 [ 0.38823533, 0.38823533, 0.45098042]],

...,

[[-0.6313726 , -0.69411767, -0.78039217],
 [-0.6392157 , -0.7019608 , -0.7882353 ],
 [-0.6392157 , -0.7019608 , -0.7882353 ],
 ...,
 [-0.4588235 , -0.6 , -0.77254903],
 [-0.49019605, -0.6313726 , -0.8039216 ],
 [-0.5058824 , -0.64705884, -0.81960785]],

```

```

[[ 0.06666672, 0.03529418, -0.03529412],
 [ 0.05098045, 0.0196079 , -0.05098039],
 [ 0.04313731, 0.01176476, -0.05882353],
 ...,
 [-0.4588235 , -0.5529412 , -0.6627451 ],
 [-0.4823529 , -0.5764706 , -0.6862745 ],
 [-0.49019605, -0.58431375, -0.69411767]],

[[ 0.7254902 , 0.7019608 , 0.64705884],
 [ 0.70980394, 0.6862745 , 0.6313726 ],
 [ 0.69411767, 0.67058825, 0.6156863 ],
 ...,
 [-0.06666666, -0.09803921, -0.18431371],
 [-0.0745098 , -0.10588235, -0.19215685],
 [-0.05882353, -0.09019607, -0.1607843 ]]],

[[[-0.54509807, -0.1607843 , 0.27843142],
 [-0.54509807, -0.1607843 , 0.27843142],
 [-0.54509807, -0.1607843 , 0.27843142],
 ...,
 [ 0.03529418, 0.24705887, 0.58431375],
 [ 0.04313731, 0.254902 , 0.5921569 ],
 [ 0.07450986, 0.28627455, 0.62352943]],

[[-0.5294118 , -0.14509803, 0.2941177 ],
 [-0.5294118 , -0.14509803, 0.2941177 ],
 [-0.52156866, -0.1372549 , 0.30196083],
 ...,
 [ 0.05098045, 0.26274514, 0.6 ],
 [ 0.04313731, 0.254902 , 0.5921569 ],
 [ 0.04313731, 0.254902 , 0.5921569 ]],

[[-0.5372549 , -0.15294117, 0.28627455],
 [-0.5372549 , -0.15294117, 0.28627455],
 [-0.5294118 , -0.14509803, 0.2941177 ],
 ...,
 [ 0.09803927, 0.30980396, 0.64705884],
 [ 0.082353 , 0.2941177 , 0.6313726 ],
 [ 0.06666672, 0.27843142, 0.6156863 ]],

...,

[[-0.32549018, -0.30196077, -0.5294118 ],
 [-0.41176468, -0.4588235 , -0.6627451 ],
 [-0.58431375, -0.7254902 , -0.8980392 ],
 ...,
 [-0.58431375, -0.7411765 , -0.8117647 ],
 [-0.6313726 , -0.8117647 , -0.8745098 ],
 [-0.7019608 , -0.88235295, -0.94509804]],

[[-0.81960785, -0.7411765 , -0.92941177],
 [-0.34117645, -0.3490196 , -0.49019605],
 [-0.654902 , -0.77254903, -0.92156863],
 ...,
 [-0.58431375, -0.7411765 , -0.79607844],
 [-0.73333335, -0.8901961 , -0.94509804],
 [-0.6627451 , -0.827451 , -0.8666667 ]],

[[-0.85882354, -0.75686276, -0.8980392 ],
 [-0.6 , -0.5764706 , -0.70980394],
 [-0.5058824 , -0.6 , -0.7254902 ],
 ...,
 [-0.6392157 , -0.79607844, -0.8666667 ],

```

```

        [-0.69411767, -0.8509804 , -0.90588236],
        [-0.62352943, -0.78039217, -0.8352941 ]]], dtype=float32), array([[1., 0., 0.,
..., 0., 0., 0.],
        [1., 0., 0., ..., 0., 0., 0.],
        [1., 0., 0., ..., 0., 0., 0.],
        ...,
        [0., 0., 0., ..., 0., 0., 1.],
        [0., 0., 0., ..., 0., 0., 1.],
        [0., 0., 0., ..., 0., 0., 1.]], dtype=float32)), Predicted=[9.9999166e-01 9.68315
93e-07 1.5438092e-06 3.1837392e-06 2.6253348e-09
5.8913634e-09 7.3930245e-08 4.3575041e-09 3.6041396e-07 2.9845236e-08
2.0578241e-06]

```

In [55]:

```

i=1
plt.figure(figsize=(6,3))
plt.subplot(1,2,1)
plot_image(i, predictions[i], test_labels, testX)
plt.subplot(1,2,2)
plot_value_array(i, predictions[i], test_labels)
plt.show()

```

Clipping input data to the valid range for imshow with RGB data ([0..1] for floats or [0..255] for integers).

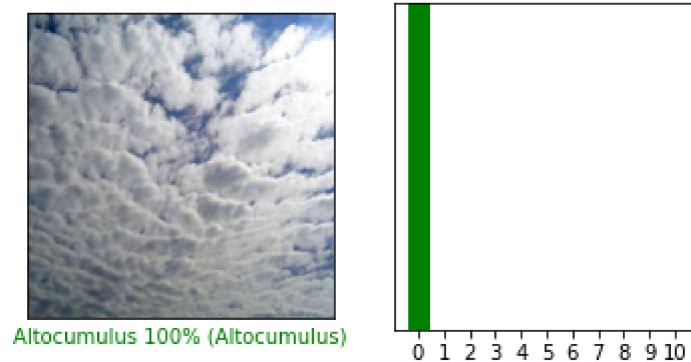

In [56]:

```

#printing the first element from predicted data
pred=CloudMobiNet_model.predict(test_batches)
print(pred[1])
#printing the index of
print('Index:', np.argmax(pred[1]))

```

```

1/1 [=====] - 3s 3s/step
[9.9999940e-01 2.8567024e-07 6.9118293e-08 8.0745348e-09 7.9743567e-10
9.3173025e-09 1.4445129e-08 9.0659498e-09 8.3250541e-08 1.5470862e-09
9.1152835e-08]
Index: 0

```

In [57]:

```

y_classes = [np.argmax(element) for element in pred]
print('Predicted_values:', pred[:110])
print('Actual_values:', y_pred[:110])

```

```

Predicted_values: [[9.9999166e-01 9.6831593e-07 1.5438092e-06 ... 3.6041396e-07
2.9845236e-08 2.0578241e-06]
[9.9999940e-01 2.8567024e-07 6.9118293e-08 ... 8.3250541e-08
1.5470862e-09 9.1152835e-08]
[9.9999869e-01 8.6377771e-12 7.9065351e-13 ... 1.3093185e-08
4.1794167e-13 1.3357350e-06]
...

```



```

[4.5870058e-10 3.7879904e-08 3.2199129e-08 ... 6.2749854e-07
 4.3797286e-08 9.9999917e-01]
[2.9766650e-04 4.3526511e-03 2.9316428e-04 ... 1.6459420e-01
 8.6311381e-03 8.1986427e-01]
[6.6972603e-08 6.0949361e-08 3.2543997e-07 ... 2.5278161e-05
 1.0236427e-03 9.9869210e-01]]
Actual_values: [ 0  0  0  0  0  0  0  0  0  0  0  1  1  1  1  1  1  1  1  1  2  2  2  2
 2  2  2  2  4  2  3  5  3  3  3  3  3  3  3  3  4  4  4  4  4  4  4  4
 4  4  5  5  5  5  5  5  5  5  5  5  6  6  6  6  6  6  6  6  7  7
 7  7  7  7  7  7  7  7  8  8 10  8 10  8  8  8  8  9  9  9  9  9  9
 9  9  9  9 10 10 10 10 10 10 10 10 10 10]

```

In [59]:

```

i=21
plt.figure(figsize=(6,3))
plt.subplot(1,2,1)
plot_image(i, predictions[i], test_labels, testX)
plt.subplot(1,2,2)
plot_value_array(i, predictions[i], test_labels)
plt.show()

```

Clipping input data to the valid range for imshow with RGB data ([0..1] for floats or [0..255] for integers).

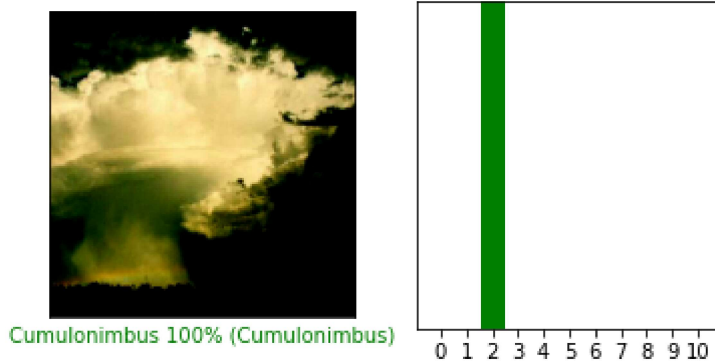

In [60]:

```

i=31
plt.figure(figsize=(6,3))
plt.subplot(1,2,1)
plot_image(i, predictions[i], test_labels, testX)
plt.subplot(1,2,2)
plot_value_array(i, predictions[i], test_labels)
plt.show()

```

Clipping input data to the valid range for imshow with RGB data ([0..1] for floats or [0..255] for integers).

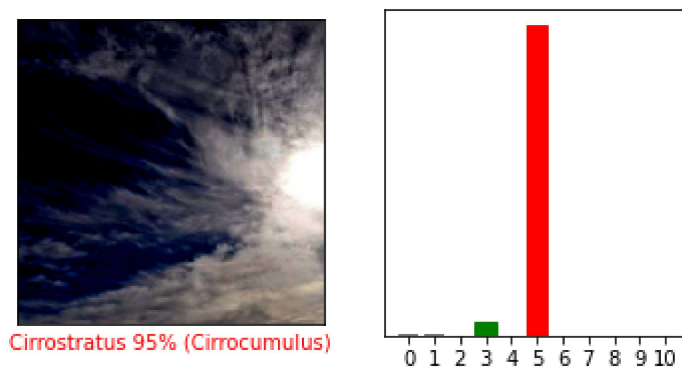

```
In [63]: i=38
plt.figure(figsize=(6,3))
plt.subplot(1,2,1)
plot_image(i, predictions[i], test_labels, testX)
plt.subplot(1,2,2)
plot_value_array(i, predictions[i], test_labels)
plt.show()
```

Clipping input data to the valid range for imshow with RGB data ([0..1] for floats or [0..255] for integers).

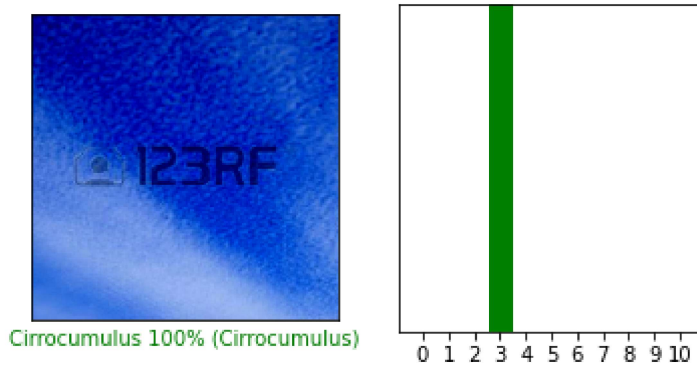

```
In [64]: i=54
plt.figure(figsize=(6,3))
plt.subplot(1,2,1)
plot_image(i, predictions[i], test_labels, testX)
plt.subplot(1,2,2)
plot_value_array(i, predictions[i], test_labels)
plt.show()
```

Clipping input data to the valid range for imshow with RGB data ([0..1] for floats or [0..255] for integers).

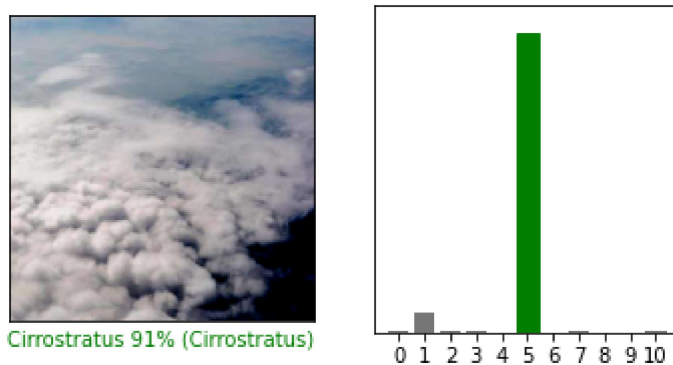

```
In [65]: i=71
plt.figure(figsize=(6,3))
plt.subplot(1,2,1)
plot_image(i, predictions[i], test_labels, testX)
plt.subplot(1,2,2)
plot_value_array(i, predictions[i], test_labels)
plt.show()
```

Clipping input data to the valid range for imshow with RGB data ([0..1] for floats or [0..255] for integers).

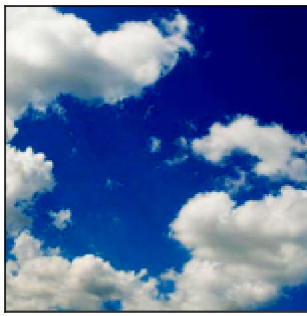

Cumulus 100% (Cumulus)

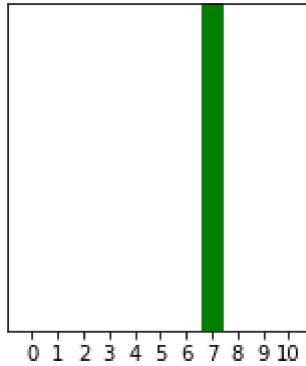

In [66]:

```
i=81
plt.figure(figsize=(6,3))
plt.subplot(1,2,1)
plot_image(i, predictions[i], test_labels, testX)
plt.subplot(1,2,2)
plot_value_array(i, predictions[i], test_labels)
plt.show()
```

Clipping input data to the valid range for imshow with RGB data ([0..1] for floats or [0..255] for integers).

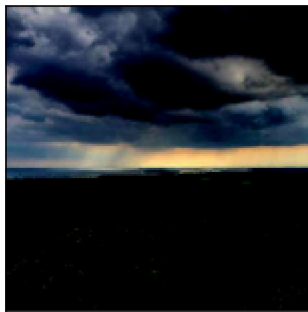

Nimbostratus 62% (Nimbostratus)

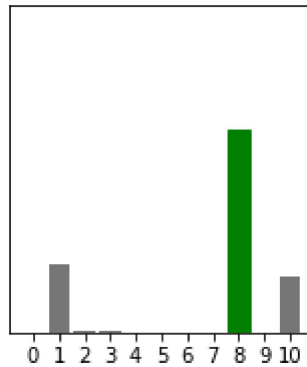

In [67]:

```
i=90
plt.figure(figsize=(6,3))
plt.subplot(1,2,1)
plot_image(i, predictions[i], test_labels, testX)
plt.subplot(1,2,2)
plot_value_array(i, predictions[i], test_labels)
plt.show()
```

Clipping input data to the valid range for imshow with RGB data ([0..1] for floats or [0..255] for integers).

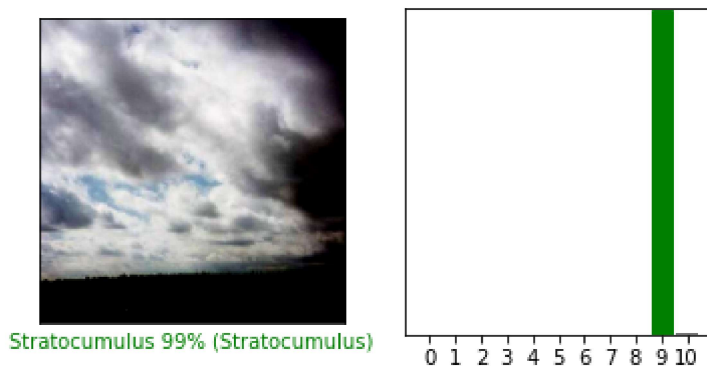

In [69]:

```
i=105
plt.figure(figsize=(6,3))
plt.subplot(1,2,1)
plot_image(i, predictions[i], test_labels, testX)
plt.subplot(1,2,2)
plot_value_array(i, predictions[i], test_labels)
plt.show()
```

Clipping input data to the valid range for imshow with RGB data ([0..1] for floats or [0..255] for integers).

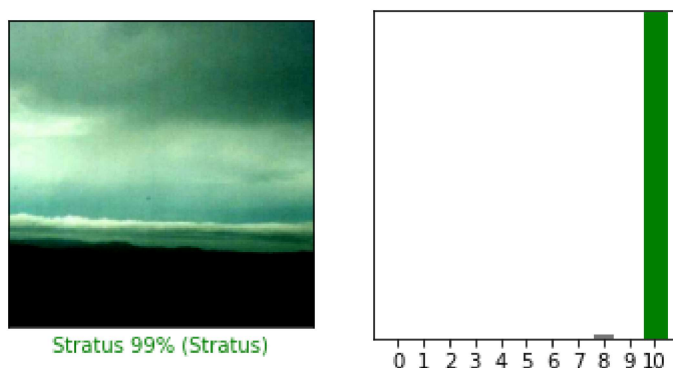

In [70]:

```
i=47
plt.figure(figsize=(6,3))
plt.subplot(1,2,1)
plot_image(i, predictions[i], test_labels, testX)
plt.subplot(1,2,2)
plot_value_array(i, predictions[i], test_labels)
plt.show()
```

Clipping input data to the valid range for imshow with RGB data ([0..1] for floats or [0..255] for integers).

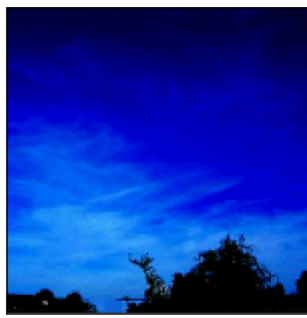

Cirrus 100% (Cirrus)

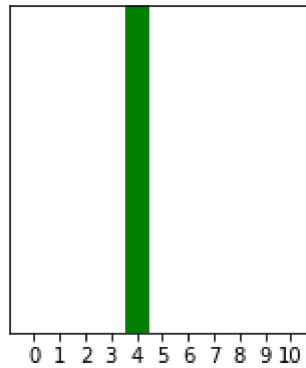

In [71]:

```
i=60
plt.figure(figsize=(6,3))
plt.subplot(1,2,1)
plot_image(i, predictions[i], test_labels, testX)
plt.subplot(1,2,2)
plot_value_array(i, predictions[i], test_labels)
plt.show()
```

Clipping input data to the valid range for imshow with RGB data ([0..1] for floats or [0..255] for integers).

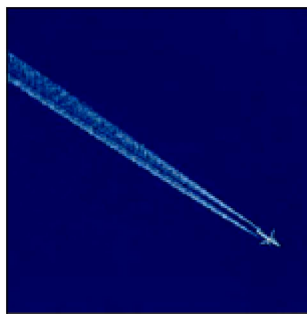

Contrails 100% (Contrails)

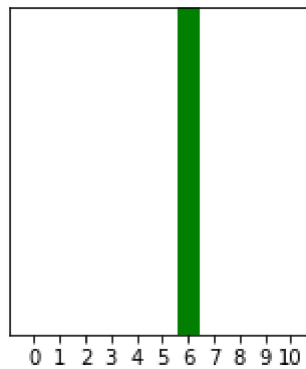

In [72]:

```
i=33
plt.figure(figsize=(6,3))
plt.subplot(1,2,1)
plot_image(i, predictions[i], test_labels, testX)
plt.subplot(1,2,2)
plot_value_array(i, predictions[i], test_labels)
plt.show()
```



[illegible]



44/48





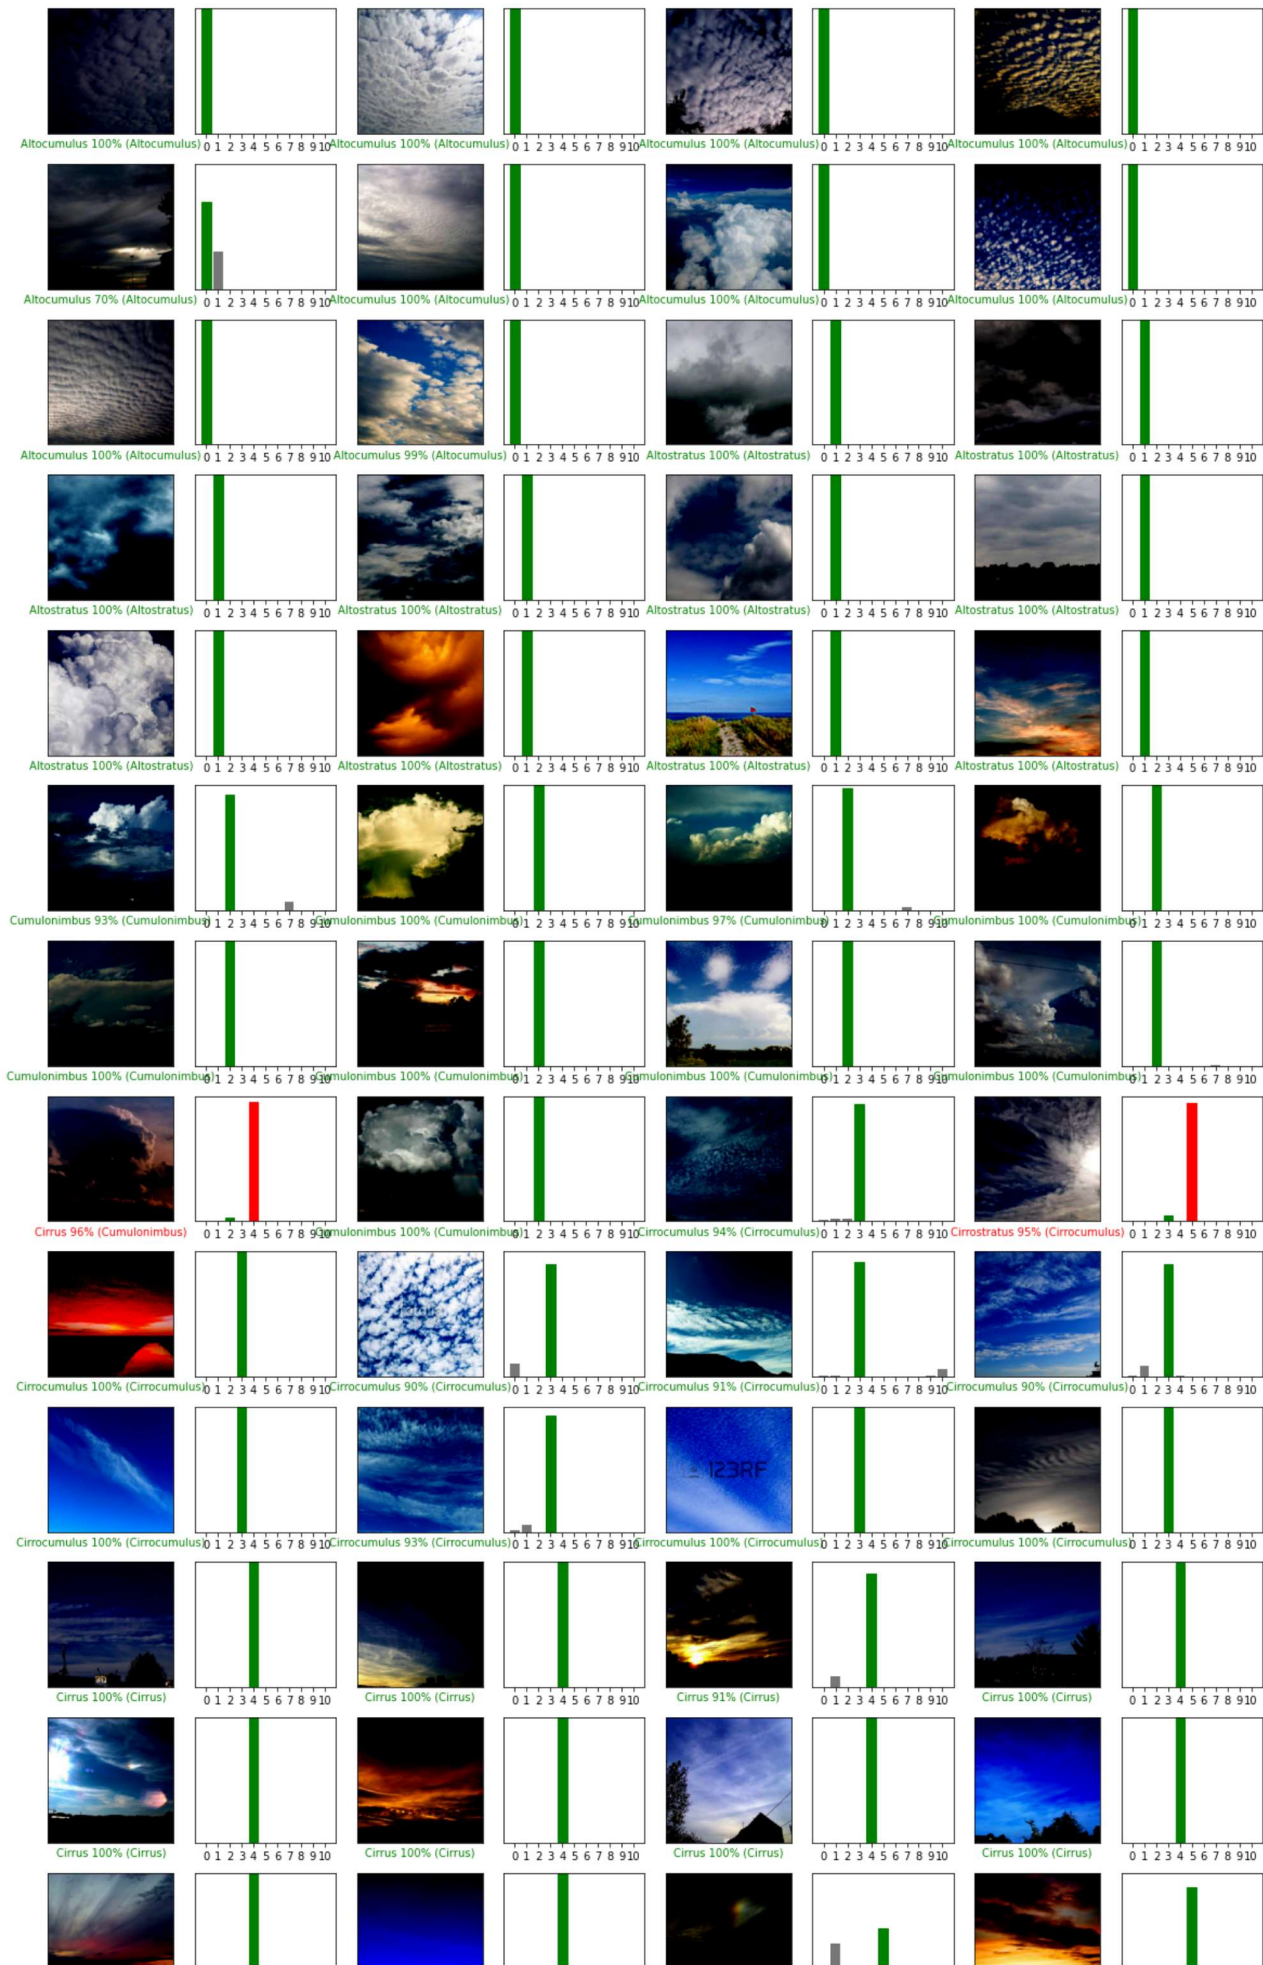

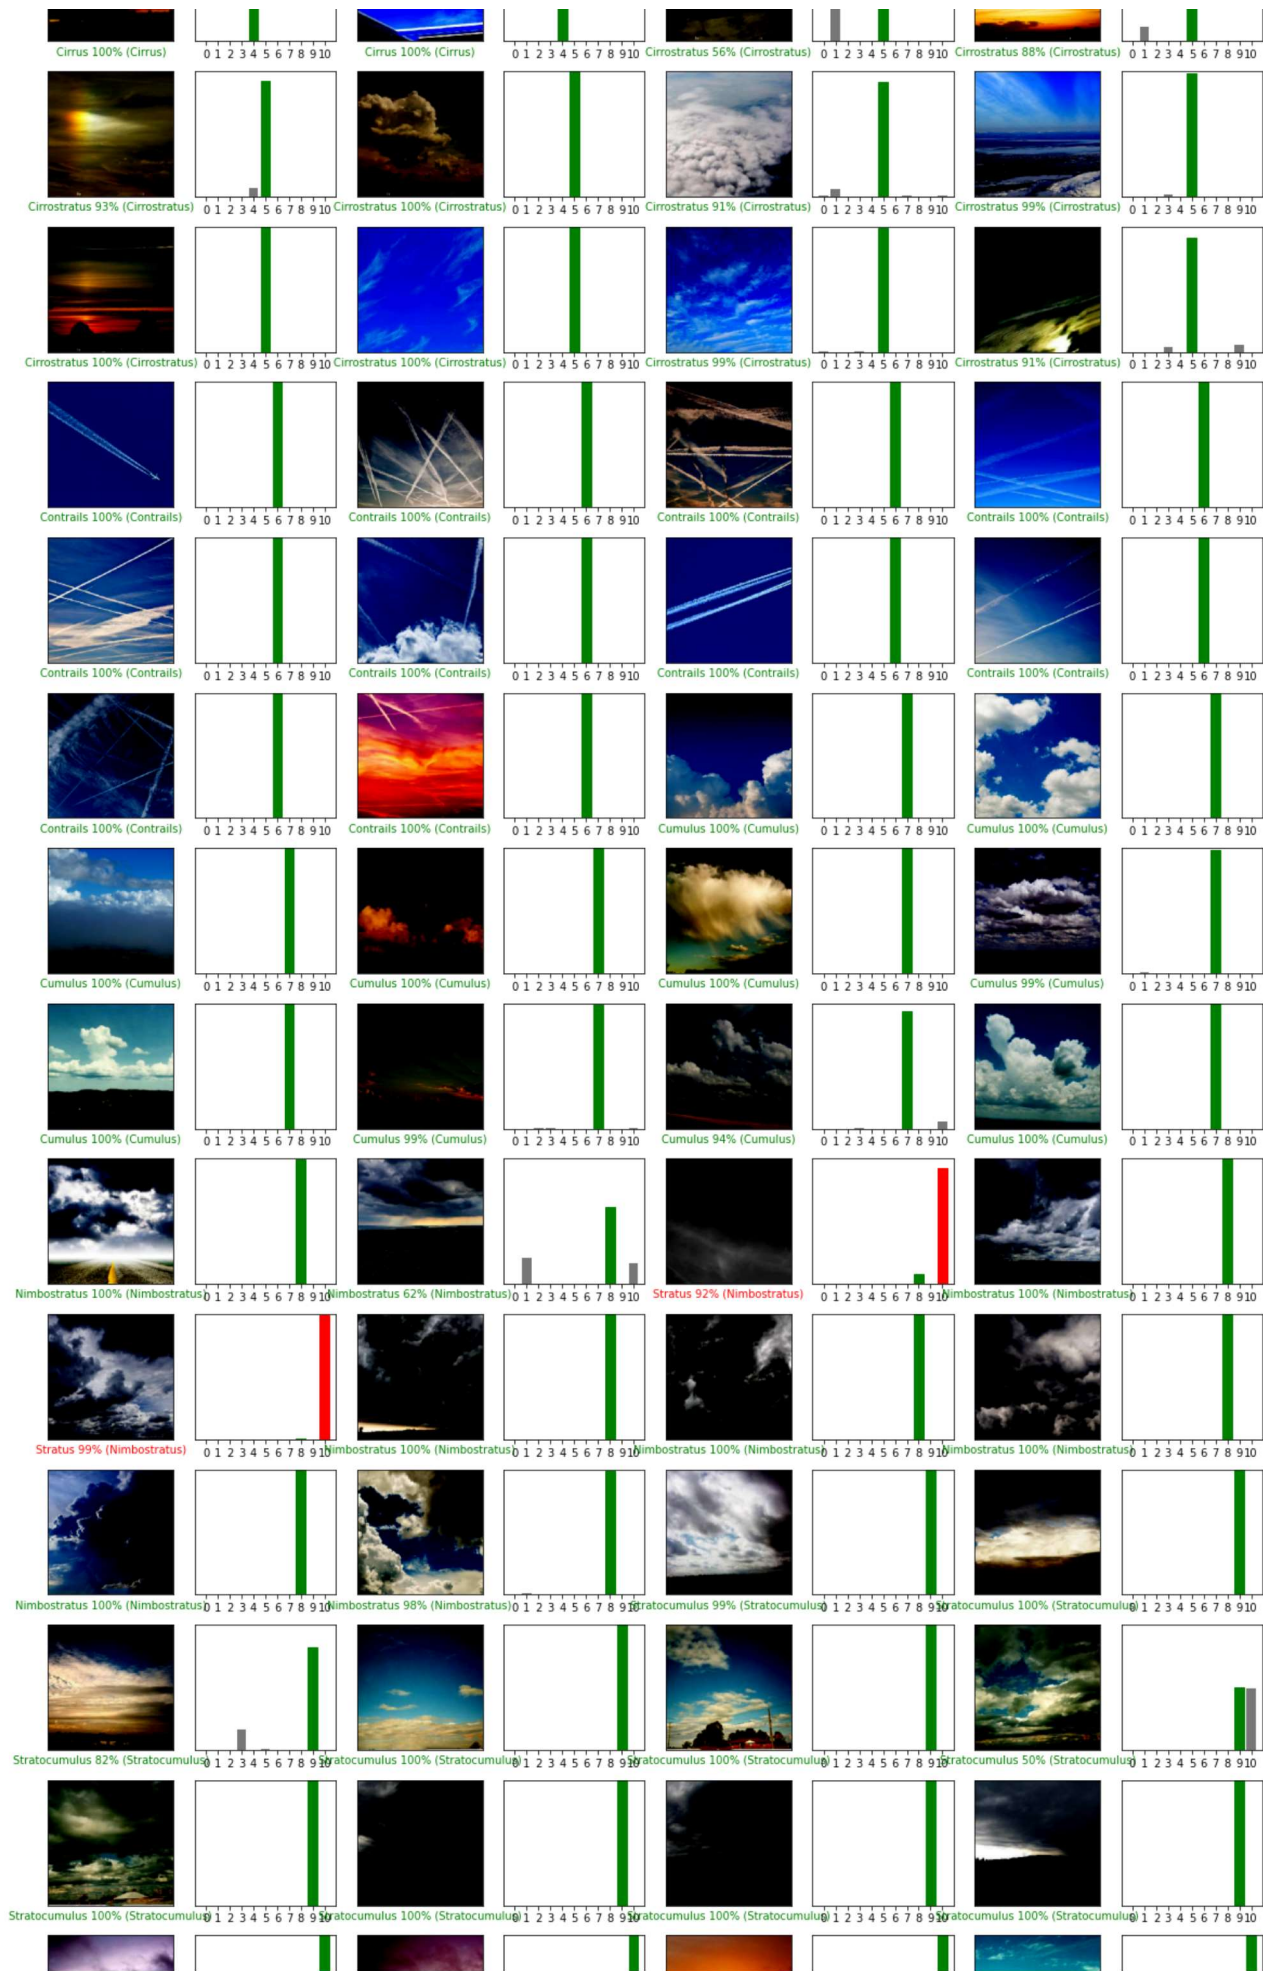

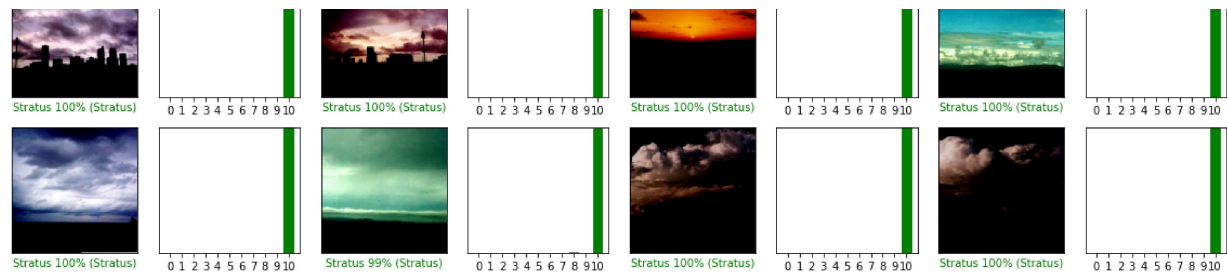

Supplement: s1 [file s1]
